# Supplementary material for: Factors influencing the decisions of senior UK doctors to retire or remain in medicine: national surveys of the UK-trained medical graduates of 1974 and 1977
Source: PubMed Central journal article supplement — BMJ Open. 2017 Oct 31;7(9):e017650. doi: 10.1136/bmjopen-2017-017650 (PMC5695300; doi:10.1136/bmjopen-2017-017650), 2017-10-31
Supplement: bmjopen-2017-017650.draft_revisions.pdf [file bmjopen-2017-017650.draft_revisions.pdf]

# BMJ Open

BMJ Open is committed to open peer review. As part of this commitment we make the peer review history of every article we publish publicly available.

When an article is published we post the peer reviewers' comments and the authors' responses online. We also post the versions of the paper that were used during peer review. These are the versions that the peer review comments apply to.

The versions of the paper that follow are the versions that were submitted during the peer review process. They are not the versions of record or the final published versions. They should not be cited or distributed as the published version of this manuscript.

BMJ Open is an open access journal and the full, final, typeset and author-corrected version of record of the manuscript is available on our site with no access controls, subscription charges or pay-per-view fees (<http://bmjopen.bmj.com>).

If you have any questions on BMJ Open's open peer review process please email [editorial.bmjopen@bmj.com](mailto:editorial.bmjopen@bmj.com)

# BMJ Open

## Factors influencing the decisions of senior UK doctors to retire or remain in medicine: national surveys of the UK-trained medical graduates of 1974 and 1977

|                                 |                                                                                                                                                                                                                                                                                                                                                                                                              |
|---------------------------------|--------------------------------------------------------------------------------------------------------------------------------------------------------------------------------------------------------------------------------------------------------------------------------------------------------------------------------------------------------------------------------------------------------------|
| Journal:                        | <i>BMJ Open</i>                                                                                                                                                                                                                                                                                                                                                                                              |
| Manuscript ID                   | bmjopen-2017-017650                                                                                                                                                                                                                                                                                                                                                                                          |
| Article Type:                   | Research                                                                                                                                                                                                                                                                                                                                                                                                     |
| Date Submitted by the Author:   | 05-May-2017                                                                                                                                                                                                                                                                                                                                                                                                  |
| Complete List of Authors:       | Smith, Fay; University of Oxford, Nuffield Department of Population Health, Richard Doll Building, Old Road Campus<br>Lachish, Shelly; University of Oxford, Nuffield Dept Population Health<br>Goldacre, Michael; University of Oxford, Nuffield Department of Population Health, Richard Doll Building, Old Road Campus<br>Lambert, Trevor; University of Oxford, Nuffield Department of Population Health |
| <b>Primary Subject Heading</b>: | Health policy                                                                                                                                                                                                                                                                                                                                                                                                |
| Secondary Subject Heading:      | Health services research, Medical education and training                                                                                                                                                                                                                                                                                                                                                     |
| Keywords:                       | HEALTH SERVICES ADMINISTRATION & MANAGEMENT, Human resource management < HEALTH SERVICES ADMINISTRATION & MANAGEMENT, Health policy < HEALTH SERVICES ADMINISTRATION & MANAGEMENT                                                                                                                                                                                                                            |
|                                 |                                                                                                                                                                                                                                                                                                                                                                                                              |

SCHOLARONE™  
Manuscripts

Only

1  
2  
3 **Factors influencing the decisions of senior UK doctors to retire or remain in**  
4 **medicine: national surveys of the UK-trained medical graduates of 1974 and**  
5 **1977**  
6  
7

8  
9  
10 **Short title:** Factors influencing retirement decisions of senior UK doctors  
11

12  
13 Fay Smith, Shelly Lachish, Michael J Goldacre, Trevor W Lambert  
14

15  
16 UK Medical Careers Research Group, Unit of Health-Care Epidemiology, Nuffield  
17 Department of Population Health, University of Oxford, Old Road Campus, Oxford  
18 OX3 7LF  
19  
20

21  
22  
23 Corresponding author: Trevor Lambert (trevor.lambert@dph.ox.ac.uk; Telephone:  
24 01865 289389)  
25  
26

27  
28  
29 **Ethical approval:** National Research Ethics Service, following referral to the  
30 Brighton and Mid-Sussex Research Ethics Committee in its role as a multi-centre  
31 research ethics committee (ref 04/Q1907/48 amendment Am02 March 2015).  
32  
33  
34

35  
36 **Guarantor:** All authors are guarantors.  
37  
38

39  
40 **Contributorship:** TL and MJG designed and conducted the surveys. SL and FS  
41 performed the analysis and wrote the first drafts of the paper. All authors had full  
42 access to all of the data (including statistical reports and tables) in the study and take  
43 responsibility for the integrity of the data and the accuracy of the data analysis. All  
44 authors contributed to further drafts and all approved the final version.  
45  
46  
47

48  
49 **Transparency:** The lead author affirms that the manuscript is an honest, accurate,  
50 and transparent account of the study being reported; that no important aspects of the  
51 study have been omitted; and that any discrepancies from the study as planned  
52 have been explained.  
53  
54  
55

1  
2  
3 **Acknowledgements:** We thank Janet Justice and Alison Stockford for data entry.  
4 We are very grateful to all the doctors who participated in the surveys.  
5  
6

7  
8 **MeSH terms:** Attitude of health personnel; physicians; workforce; medical;  
9 retirement.  
10  
11  
12  
13  
14  
15  
16  
17  
18  
19  
20  
21  
22  
23  
24  
25  
26  
27  
28  
29  
30  
31  
32  
33  
34  
35  
36  
37  
38  
39  
40  
41  
42  
43  
44  
45  
46  
47  
48  
49  
50  
51  
52  
53  
54  
55  
56  
57  
58  
59  
60

For peer review only

**ABSTRACT**

**Objective:** To report attitudes to retirement of late-career doctors.

**Design:** Questionnaires sent in 2014 to all United Kingdom (UK) medical graduates of 1974 and 1977.

**Setting:** UK.

**Participants:** 3695 medical graduates.

**Main outcome measures:** Factors which influenced doctors' decisions to retire and factors which encouraged doctors to remain in work.

**Results:** The response rate was 85% (3695/4369). Seventy per cent had retired. Of these, 67% retired when they had originally planned to, and 28% had changed their retirement plans. Fifty per cent of retired doctors cited 'increased time for leisure/other interests' as a reason; 43% cited 'pressure of work'. Women (21%) were more likely than men (11%) to retire for family reasons. Women (27%) were more likely than men (9%) to retire because of the retirement of their spouse. General Practitioners (GPs) were more likely than doctors in other specialties to cite 'pressure of work'. Anaesthetists and GPs were more likely than doctors in other specialties to cite the 'possibility of deteriorating skill/competence'. Radiologists, surgeons, obstetricians and gynaecologists, and anaesthetists were most likely to cite 'not wanting to do out-of-hours work'.

Doctors who were still working were asked what would encourage them to stay in medicine for longer. Factors cited most frequently were 'reduced impact of work-related bureaucracy' (cited by 45%) and 'workload reduction/shorter hours' (42%). Men (30%) were more motivated than women (20%) by 'financial incentivisation'. Surgeons were most motivated by 'reduction of on-call or emergency commitments'.

**Conclusions:** Retention policy should address ways of optimising the clinical contribution of senior doctors whilst offering reduced workloads in the areas of bureaucracy and working hours, particularly in respect of emergency commitments.

[270 words]

## Strengths and limitations of this study

- This is a large nationwide study with a very high response rate.
- For retired doctors, the data are based upon actual retirements and not intentions.
- Doctors who have not yet retired were surveyed at a key stage for retirement planning.
- Although a large number of retired doctors responded, some may not have done, and there is a possibility of some responder bias.
- The small minority of non-contactable doctors largely comprised those who were unregistered, either through retirement or through having left medicine or the UK. It is possible that, if surveyed, their views on the topics of the paper would differ from those of the respondents.

### **Funding:**

This is an independent report commissioned and funded by the Policy Research Programme in the Department of Health (project number 016/0118). The views expressed are not necessarily those of the funding body.

**Competing interests:** All authors have completed the Unified Competing Interest form at [www.icmje.org/coi\\_disclosure.pdf](http://www.icmje.org/coi_disclosure.pdf) (available on request from the corresponding author) and all authors want to declare: (1) financial support for the submitted work from the policy research programme, Department of Health. All authors also declare: (2) no financial relationships with commercial entities that might have an interest in the submitted work; (3) no spouses, partners, or children with relationships with commercial entities that might have an interest in the submitted work; (4) no non-financial interests that may be relevant to the submitted work.

**Data sharing:** It may be possible for the authors to make tabulated data, produced in the course of this work but not included in the paper, available to interested readers on request.

## INTRODUCTION

When doctors retire, health services lose their experience, knowledge and support.(1) In the United Kingdom (UK) one in ten Specialty and Associate Specialist (SAS) doctors and General Practitioners (GPs) are aged over 60.(2) In 2015, over 80% of senior hospital doctors in the United Kingdom were considering early retirement, with stress identified as the main cause.(3) A survey of 1400 GPs by the Wessex Local Medical Committee showed that one fifth planned to retire early.(4) The early retirement of such experienced doctors creates challenges for the medical workforce, places more stress upon remaining staff and may adversely affect patient safety.(2, 3)

A recent survey of consultant physicians in the UK found that the most common reasons for retiring cited by these doctors included pressure of work, length of working hours and dissatisfaction with the National Health Service (NHS).(5) Interviews with GPs have identified further influences, including the following: ageing and health, family life, uncertainty about the future of primary care, concerns around revalidation, increased administrative burden, and lack of time with patients.(6, 7) A cohort of UK-trained doctors, across all specialties, in their early fifties revealed that these doctors considered early retirement for family/leisure reasons, and because of concerns about health, workload, and changes in the NHS.(8)

Much of the research focus on how to retain doctors nearing retirement has been on GPs. In interviews, GPs have suggested a need for reduced workload, a focus upon their own health, and improvements in morale.(6) Other research on retention of the GP workforce calls for a slower pace of administrative change and less work outside face-to-face patient care.(7) In one study, half of hospital consultants working in Scotland said they would postpone retirement if their workload reduced.(9)

We have studied the careers of the UK-trained medical qualifiers of 1974 and 1977 periodically from the first year after they qualified. In our latest survey we asked about retirement status, intentions to retire for those who had not already done so, and attitudes to retirement. The aim of this paper is to report on factors which had influenced the decision to retire and on factors that might encourage doctors to stay in medicine longer. We compared the replies of men and women, and of those working (or who had worked) in different specialties.

## METHODS

In 2014 the UK Medical Careers Research Group surveyed the UK medical graduates of 1974 and 1977 using identical postal and web-based questionnaires. Up to four reminders were sent to non-respondents. Further details of the methodology are available elsewhere (10).

The surveys sent to both cohorts were identical and comprised structured, 'closed' questions and statements. Doctors were asked to indicate which one of seven phrases best described their current employment status: *working full-time in medicine*; *working part-time in medicine*; *working full-time outside medicine*; *working part-time outside medicine*; *retired, not now working in medicine*; *retired and 'returned' for some medical work*; *other*.

Retirees and doctors who had 'retired and returned', were asked to indicate which, if any, of the following factors had influenced their decision to retire when they did: *pressure of work*; *not wanting to do out-of-hours work*; *family reasons*; *to increase time for leisure/other interests*; *reduced job satisfaction*; *retirement of spouse/partner*; *financial security/insufficient financial incentive to stay*; *possibility of deteriorating skills/competence*; *the prospect of revalidation*; *poor health*; *to maintain good health*; *'none of the above – I just wanted to retire'*; *other*.

Doctors still working in medicine (full or part-time) were asked 'Would any of the following factors encourage you to stay working in medicine longer?' Doctors could choose from one or more of the following factors: *workload reduction/shorter hours*; *reduction of on-call or emergency commitments*; *reduced impact of work-related bureaucracy*; *financial incentivisation*; *improved working conditions, other than (or as well as) hours*; *career change and development opportunities*; *more involvement in direct patient care*; *less involvement in direct patient care*; *none of these*; *other*.

In each case the list of response options offered was developed in part by studying text responses from doctors to previous surveys and in part by reviewing the literature on retirement and factors affecting retirement decisions.

We allocated a *career specialty* to each respondent using their recorded job history as reported to us in successive surveys and additional information about their specialist registration with the GMC as reported to us by the doctors in these surveys. For a small number of respondents we were unable to allocate a single career specialty, either because we did not have sufficient data about the doctor's career, or because the doctor had worked



1  
2  
3 in different specialties during their career. The career specialty allocation allowed us to  
4 analyse the responses and employment status of doctors in different specialties.  
5 Respondents were then grouped for analysis into these groups: *hospital medical specialties,*  
6 *surgical specialties, paediatrics, emergency medicine, obstetrics and gynaecology,*  
7 *anaesthesia, radiology, clinical oncology, pathology, psychiatry, and general practice / family*  
8 *medicine (GP).*  
9  
10  
11

12  
13 The replies were analysed using  $\chi^2$  tests and Mann-Whitney U tests to explore differences in  
14 views towards retirement between men and women, between cohorts and between doctors  
15 working in different specialties. Statistical analysis was undertaken using SPSS version 22.  
16 Numbers of doctors were small in a few combinations of (for example) specialty and gender,  
17 but we report them for the record.  
18  
19  
20  
21  
22  
23  
24  
25  
26  
27  
28  
29  
30  
31  
32  
33  
34  
35  
36  
37  
38  
39  
40  
41  
42  
43  
44  
45  
46  
47  
48  
49  
50  
51  
52  
53  
54  
55  
56  
57  
58  
59  
60

## RESULTS

### Response rates

There were 5482 graduating doctors in the two year-of-graduation cohorts we studied: 1974 (2347 graduates) and 1977 (3135 graduates). Across both cohorts 677 doctors were not contactable, 210 were deceased, 70 had told us that they did not wish to participate, and 156 doctors who had never replied to any of our previous surveys were not contacted.

The aggregated response rate of the remaining contactable doctors, over both surveys, was 84.6% (3695/4369). Taking the two cohorts together, the responders represent 70% of all surviving graduates and 85% of the contactable doctors. An abbreviated questionnaire which omitted some of the content reported here was completed by 98 graduates: we exclude these from further analysis.

The median age of the doctors from the cohorts at the time of the surveys was 64 for the 1974 cohort and 61 for the 1977 cohort. The median age for men was 62; 61 for women.

### Current employment status

Over both cohorts, 44% (1572/3597) of respondents had retired from medicine and were no longer working in medicine (38% of men, 56% of women); 26% (935/3597) had retired and returned for some medical work (29% of men, 20% of women); and 29% (1043/3597) were still working in medicine (32% of men, 23% of women). Therefore, 55% of respondents overall were still working in medicine (whether they hadn't retired or had retired-and-returned; 61% of men, 43% of women). Over both cohorts, 0.8% were working outside medicine and 0.5% did not give their employment status.

### Retired, and retired and 'returned' doctors: circumstances of retirement

When asked 'What were the circumstances of your retirement?', most of the retired doctors (66.8%) had retired when they had planned to retire, while 27.7% had retired not when originally planned (14.0% due to changes in the work environment and 13.7% due to changes in personal circumstances; Table 1). Retired doctors from the 1974 cohort were a little more likely to have retired when they had planned to retire compared with the 1977 cohort. In comparing the responses of doctors in different specialties, we did not consider doctors in emergency medicine or clinical oncology for comparison, owing to small counts. Radiologists were most likely to have retired when they had planned to retire (79.4%) and hospital medical specialists were least likely (62.4%; Table 1). Psychiatrists were most likely to report that their retirement was unplanned and due to a change in the work environment

1  
2  
3 (21.3%). GPs were most likely to report that their retirement was unplanned and due to  
4 changes in personal circumstances (15.2%).  
5  
6

### 7 **Retired doctors: reasons for retiring**

8  
9 When asked which factors had influenced their decision to retire, the retired doctors most  
10 frequently cited 'increased time for leisure/other interests' as contributing to their decision to  
11 retire when they did (50.4%; Table 2). 'Pressure of work' was cited by 42.8%. Women were  
12 more likely than men to retire due to the retirement of a spouse or partner (Table 2). Further  
13 inspection within each specialty revealed that this gender difference was present in all  
14 specialties except Surgery, Obstetrics and gynaecology, Radiology, Pathology, and  
15 Psychiatry: while more women than men in these specialties cited 'Retirement of a  
16 spouse/partner', these differences were not significant. In General practice 28.4% of women  
17 cited this reason compared with 10.4% of men.  
18  
19  
20  
21  
22  
23

24 Overall, women were more likely than men to retire for family reasons (Table 2): this  
25 difference was most pronounced among GPs (cited by 20.7% of women and 12.2% of men;  
26  $p < 0.001$ ) and Hospital medical specialists (cited by 30.6% of women and 13.3% of men,  
27  $p < 0.01$ ). Men were more likely than women to retire for financial reasons. This difference  
28 was significant within both cohorts. Further inspection within each specialty grouping  
29 revealed that this gender difference was only present among GPs (men GPs: 33.3%, women  
30 GPs: 23.7%).  
31  
32  
33  
34  
35

36 Men were also more likely than women to retire because they did not want to do out-of-hours  
37 work: this difference was most marked amongst hospital medical specialists (men 16.4%,  
38 women 5.6%) and paediatricians (men 26.7%, women 10.1%), and was significant within  
39 both cohorts.  
40  
41  
42

43  
44 Retired doctors from the younger 1977 cohort were significantly more likely than doctors  
45 from the 1974 cohort to have retired due to pressure of work (36.4% 1974, 48.3% 1977),  
46 reduced job satisfaction (35.8% 1974, 45.9% 1977), or for financial reasons (25.3% 1974,  
47 32.4% 1977). This suggests that these factors are more relevant to decisions about early  
48 retirement.  
49  
50  
51  
52

53 Retired GPs were more likely to cite 'pressure of work' as a reason for retiring than doctors  
54 in other specialties (Table 3). Anaesthetists and GPs were more likely to cite the 'possibility  
55 of deteriorating skill/competence' than doctors in other specialties. Radiologists, surgeons,  
56 obstetricians and gynaecologists, and anaesthetists were more likely to cite 'not wanting to  
57  
58  
59  
60

1  
2  
3 do out-of-hours work' compared with doctors in other specialties. This pattern of reasons for  
4 retirement was observed in both cohorts ( $p<0.001$ ).  
5  
6

### 7 8 **Doctors still working: retirement plans**

9 The doctors still working were asked which factors would encourage them to stay in  
10 medicine for longer. These doctors most frequently cited 'reduced impact of work-related  
11 bureaucracy' as a factor that would encourage them to stay working in medicine for longer  
12 (45.4%; Table 4), and 'workload reduction/shorter hours' (42.2%). Men were more likely than  
13 women to be encouraged by 'financial incentivisation'. This difference was significant within  
14 both cohorts ( $p<0.05$ ).  
15  
16  
17  
18

19  
20 Doctors from the 1977 cohort were significantly more likely than doctors from the 1974  
21 cohort to be encouraged to remain by 'workload reduction/shorter hours' (32.5% 1974,  
22 46.6% 1977) and 'improved working conditions' (14.0% 1974, 22.8% 1977).  
23  
24

25  
26 There was little variation by specialty grouping in the scoring of factors which would  
27 encourage doctors to stay in medicine longer (Table 5). There was significant variation on  
28 only one factor: reduction of on call or emergency commitments, assigned more importance  
29 by surgeons.  
30  
31  
32  
33  
34  
35  
36  
37  
38  
39  
40  
41  
42  
43  
44  
45  
46  
47  
48  
49  
50  
51  
52  
53  
54  
55  
56  
57  
58  
59  
60

## DISCUSSION

### Main findings

Over half of the respondents were still working in medicine (whether having retired and returned, or having never retired). Of those doctors who had retired, two thirds had retired when they had planned to retire and one quarter had an unplanned retirement due to either a change in the work environment or a change in personal circumstances. Doctors retired mainly to spend more time on leisure and other interests, or due to work pressures. More women than men retired due to the retirement of a spouse or partner: this difference was pronounced in General Practice, and less pronounced in specialties such as Surgery. More women than men retired due to family reasons (especially among GPs and Hospital medical specialists). More men GPs than women GPs retired for financial reasons, citing '*financial security/insufficient financial incentive to stay*'. More men than women in the hospital medical specialties and paediatrics cited retiring because they did not want to do out-of-hours work.

Certain retirement factors were cited more by the younger 1977 cohort than the 1974 cohort (pressure of work, reduced job satisfaction, financial reasons), suggesting that doctors considering early retirement are more influenced by these factors.

There were differences between specialties. More GPs cited 'pressure of work', more anaesthetists and GPs cited the 'possibility of deteriorating skill/competence', and more radiologists, surgeons, obstetrician and anaesthetists cited 'not wanting to do out-of-hours work' compared with doctors in other specialties.

The doctors still working cited two main factors that would encourage them to stay working in medicine for longer: 'reduced impact of work-related bureaucracy' and 'workload reduction/shorter hours'. More men than women could be encouraged to remain in medicine by financial incentivisation. More surgeons cited a reduction of on call or emergency commitments as influential to a future decision to stay.

### Strengths and limitations

This is a large study with a very high response rate among contactable doctors (85%). In the case of the retired doctors in our study the data are based upon actual retirements and not intentions. In the case of the doctors who have not yet retired, we ask about factors that might encourage them to stay at a key stage when these doctors are typically considering retirement, therefore their answers are gathered at an optimal time. As has been mentioned elsewhere, retired doctors may be less likely to respond.(1) The non-contactable doctors largely comprised those who had ceased GMC registration, either through retirement or

1  
2  
3 through having left medicine or the UK. It is possible that, if surveyed, their views on the  
4 topics of the paper would differ from those of the respondents.  
5  
6

### 7 8 **Comparison with existing literature**

9 We found that a desire to spend more time on leisure/other interests and pressure of work  
10 were key factors in retirement decisions for the retired doctors we surveyed. A recent UK  
11 study found that 81% of senior hospital doctors were considering retiring earlier due to work  
12 pressures;(3) similarly, the most common reason for intended early retirement cited by UK  
13 consultants is pressure of work.(5) Family reasons and leisure time were the main reasons  
14 cited by senior UK doctors when considering early retirement.(8) A systematic review of  
15 retirement planning among doctors found that workload and burnout were the most common  
16 reasons provided for early retirement.(11)  
17  
18  
19  
20  
21

22  
23 Our finding that more GPs cited 'pressure of work' than doctors in other specialties, is  
24 consistent with other research which has found that GPs are concerned about high  
25 workloads.(6)  
26  
27

28  
29 We found that doctors could be encouraged to stay in practice by reducing work-related  
30 bureaucracy and reducing workload/hours. Other research has found that doctors can be  
31 encouraged to stay working in medicine by reducing workplace frustration and workload  
32 pressure.(11)  
33  
34  
35

### 36 **Implications / conclusions**

37  
38 Doctors described a variety of professional and personal motivators for choosing the timing  
39 of their retirement. Some of the reasons given may be amenable to policy initiatives, which  
40 could result in securing a longer contribution to the health service by some doctors than  
41 would otherwise be the case. Retention policy should address ways of optimising the clinical  
42 contribution of senior doctors. For example, staged retirement with reduced workloads in the  
43 areas of bureaucracy and working hours, particularly in respect of emergency commitments,  
44 may enable seniors to continue using their skills for longer.  
45  
46  
47  
48  
49

50 [2526 words]  
51  
52  
53  
54  
55  
56  
57  
58  
59  
60

**REFERENCES**

1. Joyce CM, Wang WC, McDonald HM. Retirement patterns of Australian doctors aged 65 years and older. *Aust Health Rev.* 2015;**39**:582-7.
2. British Medical Association. 2014 UK Medical Workforce Briefing. London: British Medical Association. 2014.
3. Hospital Consultants and Specialists Association. Who cares for the carers? The impact of workplace stress on senior hospital doctors. London: Hospital Consultants and Specialists Association. 2015.
4. British Medical Association. Survey reveals extent of GP workforce crisis. <https://www.bma.org.uk/news/2014/may/survey-reveals-extent-of-gp-workforce-crisis> (accessed 17th Nov 2016 Accessed 17th Nov 2016).
5. Royal College of Physicians. Census of consultant physicians and higher specialty trainees in the UK 2014-15. London: Royal Colleges of Physicians. 2016.
6. Sansom A, Calitri R, Carter M, Campbell J. Understanding quit decisions in primary care: A qualitative study of older GPs. *BMJ Open.* [Article]. 2016;**6**:e010592.
7. Doran N, Fox F, Rodham K, Taylor G, Harris M. Lost to the NHS: A mixed methods study of why GPs leave practice early in England. *Br J Gen Pract.* [Article]. 2016;**66**:e128-e34.
8. Taylor K, Lambert T, Goldacre M. Future career plans of a cohort of senior doctors working in the National Health Service. *J R Soc Med.* 2008;**101**:182-90.
9. French FH, Andrew JE, Awramenko M, Coutts H, Leighton-Beck L, Mollison J, et al. Consultants in NHS Scotland: A survey of work commitments, remuneration, job satisfaction and retirement plans. *Scott Med J.* 2004;**49**:47-52.
10. Lambert T, Goldacre M. Participation in medicine by graduates of medical schools in the United Kingdom up to 25 years post graduation: National cohort surveys. *Acad Med.* 2013;**88**:699-709.
11. Silver MP, Hamilton AD, Biswas A, Warrick NI. A systematic review of physician retirement planning. *Human Resources for Health.* [journal article]. 2016;**14**:67.

Table 1: Responses to the question 'What were the circumstances of your retirement?': retired and 'retired and returned' doctors from the 1974 and 1977 cohorts

| Respondents                  | I retired when I had planned to retire |      | It was unplanned and due to a change in the work environment |     | It was unplanned and due to changes in personal circumstances |     | Other |     | Total (100%)<br>N |
|------------------------------|----------------------------------------|------|--------------------------------------------------------------|-----|---------------------------------------------------------------|-----|-------|-----|-------------------|
|                              | %                                      | n    | %                                                            | n   | %                                                             | n   | %     | n   |                   |
| All                          | 66.8                                   | 1608 | 14.0                                                         | 336 | 13.7                                                          | 329 | 5.5   | 133 | 2406              |
| Retirement status            |                                        |      |                                                              |     |                                                               |     |       |     |                   |
| Retired                      | 65.4                                   | 1009 | 13.6                                                         | 209 | 16.3                                                          | 251 | 4.7   | 73  | 1542              |
| Retired and returned         | 69.3                                   | 599  | 14.7                                                         | 127 | 9.0                                                           | 78  | 6.9   | 60  | 864               |
| Cohort                       |                                        |      |                                                              |     |                                                               |     |       |     |                   |
| 1974 graduates               | 69.3                                   | 762  | 13.0                                                         | 143 | 11.9                                                          | 131 | 5.7   | 63  | 1099              |
| 1977 graduates               | 64.7                                   | 846  | 14.8                                                         | 193 | 15.1                                                          | 198 | 5.4   | 70  | 1307              |
| Gender                       |                                        |      |                                                              |     |                                                               |     |       |     |                   |
| Men                          | 68.4                                   | 1091 | 13.1                                                         | 209 | 12.7                                                          | 203 | 5.7   | 91  | 1594              |
| Women                        | 63.7                                   | 517  | 15.6                                                         | 127 | 15.5                                                          | 126 | 5.2   | 42  | 812               |
| Specialty group              |                                        |      |                                                              |     |                                                               |     |       |     |                   |
| Hospital medical specialties | 62.4                                   | 141  | 13.3                                                         | 30  | 14.6                                                          | 33  | 9.7   | 22  | 226               |
| Surgery                      | 71.3                                   | 139  | 13.8                                                         | 27  | 12.3                                                          | 24  | 2.6   | 5   | 195               |
| General practice             | 67.1                                   | 809  | 13.4                                                         | 162 | 15.2                                                          | 183 | 4.3   | 52  | 1206              |
| Paediatrics                  | 66.1                                   | 72   | 12.8                                                         | 14  | 13.8                                                          | 15  | 7.3   | 8   | 109               |
| Emergency medicine           | 77.8                                   | 14   | 0.0                                                          | 0   | 22.2                                                          | 4   | 0.0   | 0   | 18                |
| Obstetrics and gynaecology   | 75.0                                   | 30   | 12.5                                                         | 5   | 10.0                                                          | 4   | 2.5   | 1   | 40                |
| Anaesthetics                 | 71.7                                   | 109  | 12.5                                                         | 19  | 9.2                                                           | 14  | 6.6   | 10  | 152               |
| Radiology                    | 79.4                                   | 54   | 8.8                                                          | 6   | 4.4                                                           | 3   | 7.4   | 5   | 68                |
| Clinical oncology            | 62.5                                   | 15   | 4.2                                                          | 1   | 20.8                                                          | 5   | 12.5  | 3   | 24                |
| Pathology                    | 67.5                                   | 77   | 16.7                                                         | 19  | 8.8                                                           | 10  | 7.0   | 8   | 114               |
| Psychiatry                   | 61.7                                   | 87   | 21.3                                                         | 30  | 7.8                                                           | 11  | 9.2   | 13  | 141               |

Chi-square tests for: Retirement status ( $\chi^2_3=28.0$ ,  $p<0.001$ ), Cohort ( $\chi^2_3=7.9$ ,  $p=0.048$ ), Gender ( $\chi^2_3=7.6$ ,  $p=0.54$ ), Specialty group ( $\chi^2_{30}=56.4$ ,  $p=0.002$ ). 1974 graduates by specialty group ( $\chi^2_{30}=34.4$ ,  $p=0.264$ ), 1977 graduates by specialty group ( $\chi^2_{30}=44.7$ ,  $p=0.041$ ). 1974 graduates by gender ( $\chi^2_3=3.3$ ,  $p=0.348$ ), 1977 graduates by gender ( $\chi^2_3=3.5$ ,  $p=0.318$ ). Within each specialty group, by gender, only anaesthetics was significant ( $\chi^2_3=11.3$ ,  $p=0.010$ ).



Table 2: Doctors who have retired: self-reported factors contributing to their wish to retire

| Factor                                                       | Men (N=1663) |     | Women (N=844) |     | Total (N=2507) |      |
|--------------------------------------------------------------|--------------|-----|---------------|-----|----------------|------|
|                                                              | %            | n   | %             | n   | %              | n    |
| To increase time for leisure/other interests                 | 51.2         | 852 | 48.8          | 412 | 50.4           | 1264 |
| Pressure of work                                             | 42.3         | 704 | 43.8          | 370 | 42.8           | 1074 |
| Reduced job satisfaction                                     | 41.4         | 689 | 41.0          | 346 | 41.3           | 1035 |
| To maintain good health                                      | 32.5         | 540 | 30.6          | 258 | 31.8           | 798  |
| Financial security/insufficient financial incentive to stay* | 32.1         | 533 | 23.5          | 198 | 29.2           | 731  |
| The prospect of revalidation                                 | 22.9         | 380 | 23.7          | 200 | 23.1           | 580  |
| Possibility of deteriorating skill/competence                | 18.0         | 299 | 16.9          | 143 | 17.6           | 442  |
| Other                                                        | 17.1         | 285 | 17.2          | 145 | 17.2           | 430  |
| Not wanting to do out-of-hours work*                         | 18.2         | 302 | 10.7          | 90  | 15.6           | 392  |
| Retirement of spouse/ partner*                               | 9.4          | 156 | 26.5          | 224 | 15.2           | 380  |
| Family reasons*                                              | 11.4         | 189 | 20.9          | 176 | 14.6           | 365  |
| Poor health                                                  | 11.5         | 191 | 9.6           | 81  | 10.8           | 272  |
| None of the above – I just wanted to retire                  | 6.9          | 115 | 8.1           | 68  | 7.3            | 183  |

\*Gender comparisons on each row of the table ( $\chi^2_1$  tests):  $p < 0.001$ .  
 Respondents could select all that applied to them.

Table 3: Factors contributing to retirement decisions by specialty

| Factor                                                      | Specialty group                         |                    |                              |                        |                         |                      |                       | Total<br>(N=2229) |
|-------------------------------------------------------------|-----------------------------------------|--------------------|------------------------------|------------------------|-------------------------|----------------------|-----------------------|-------------------|
|                                                             | Hospital medical specialties<br>(N=237) | Surgery<br>(N=206) | General practice<br>(N=1249) | Paediatrics<br>(N=114) | Anaesthetics<br>(N=157) | Pathology<br>(N=119) | Psychiatry<br>(N=147) |                   |
| To increase time for leisure/other interests                | 55.3                                    | 45.1               | 52.5                         | 47.4                   | 52.9                    | 52.9                 | 45.6                  | 51.5              |
| Pressure of work*                                           | <b>32.5</b>                             | <b>28.6</b>        | <b>51.6</b>                  | 41.2                   | <b>32.5</b>             | 42.0                 | 37.4                  | 44.1              |
| Reduced job satisfaction                                    | 34.6                                    | 44.2               | 44.6                         | 40.4                   | 38.9                    | 35.3                 | 45.6                  | 42.4              |
| To maintain good health                                     | 29.5                                    | 29.6               | 34.7                         | 24.6                   | 36.9                    | 22.7                 | 31.3                  | 32.5              |
| Financial security/insufficient financial incentive to stay | 27.0                                    | 31.1               | 30.0                         | 21.9                   | 34.4                    | 24.4                 | 35.4                  | 29.7              |
| The prospect of revalidation                                | 21.9                                    | 18.9               | 26.7                         | 22.8                   | 24.2                    | 20.2                 | 15.6                  | 24.0              |
| Possibility of deteriorating skill/competence*              | <b>9.7</b>                              | 16.0               | <b>20.3</b>                  | 15.8                   | <b>31.2</b>             | 9.2                  | 10.2                  | 18.0              |
| Other*                                                      | 21.5                                    | 19.9               | <b>13.1</b>                  | 21.1                   | 17.2                    | 20.2                 | 23.8                  | 16.4              |
| Not wanting to do out-of-hours work*                        | 13.1                                    | <b>29.6</b>        | <b>9.8</b>                   | 16.7                   | <b>29.3</b>             | 16.0                 | 14.3                  | 14.3              |
| Retirement of spouse/ partner                               | 18.6                                    | 8.3                | 16.6                         | 19.3                   | 14.0                    | 16.8                 | 12.9                  | 15.7              |
| Family reasons                                              | 18.6                                    | 14.1               | 15.1                         | 19.3                   | 8.9                     | 9.2                  | 11.6                  | 14.6              |
| Poor health                                                 | 8.9                                     | 8.7                | 11.5                         | 9.6                    | 7.6                     | 14.3                 | 9.5                   | 10.6              |
| None of the above – I just wanted to retire                 | 5.5                                     | 5.8                | 7.5                          | 9.6                    | 4.5                     | 6.7                  | 5.4                   | 6.9               |

Table shows specialties with over 100 respondents.

For numbers corresponding to percentages, and numbers for small number specialties, see Appendix 1.

\*Specialty comparisons on each row of the table ( $\chi^2_6$  tests):  $p < 0.001$ .

Significantly high or low percentages are indicated in **bold**.

Table 4: Factors that would encourage doctors to stay working in medicine for longer, for men and women

| Factor encouraging doctors to stay                            | Men (N=790) |     | Women (N=253) |     | Total (N=1043) |     |
|---------------------------------------------------------------|-------------|-----|---------------|-----|----------------|-----|
|                                                               | n           | %   | n             | %   | n              | %   |
| Reduced impact of work-related bureaucracy                    | 44.9        | 355 | 47.0          | 119 | 45.4           | 474 |
| Workload reduction/shorter hours                              | 42.8        | 338 | 40.3          | 102 | 42.2           | 440 |
| Financial incentivisation*                                    | 29.6        | 234 | 20.2          | 51  | 27.3           | 285 |
| None of these                                                 | 24.1        | 190 | 22.5          | 57  | 23.7           | 247 |
| Reduction of on-call or emergency commitments                 | 25.2        | 199 | 18.6          | 47  | 23.6           | 246 |
| Improved working conditions, other than (or as well as) hours | 19.0        | 150 | 23.3          | 59  | 20.0           | 209 |
| Career change and development opportunities                   | 11.4        | 90  | 11.5          | 29  | 11.4           | 119 |
| Other                                                         | 9.0         | 71  | 11.5          | 29  | 9.6            | 100 |
| More involvement in direct patient care                       | 7.6         | 60  | 7.5           | 19  | 7.6            | 79  |
| Less involvement in direct patient care                       | 5.2         | 41  | 5.5           | 14  | 5.3            | 55  |

\*Gender comparisons on each row of the table ( $\chi^2_1$  tests):  $p < 0.01$ .

Table 5: Factors that would encourage doctors to stay working in medicine for longer, by specialty

| Factor encouraging doctors to stay                            | Hospital medical specialties (N=174)<br>% | Surgery (N=143)<br>% | General practice (N=384)<br>% | Total (N=701)<br>% |
|---------------------------------------------------------------|-------------------------------------------|----------------------|-------------------------------|--------------------|
| Reduced impact of work-related bureaucracy                    | 44.3                                      | 46.2                 | 51.8                          | 47.3               |
| Workload reduction/shorter hours                              | 44.3                                      | 42.7                 | 41.9                          | 43.5               |
| Financial incentivisation                                     | 27.6                                      | 32.9                 | 24.5                          | 28.2               |
| Reduction of on-call or emergency commitments*                | 25.3                                      | <b>32.9</b>          | 15.1                          | 24.7               |
| None of these                                                 | 19.5                                      | 18.9                 | 25.5                          | 23.2               |
| Improved working conditions, other than (or as well as) hours | 19.5                                      | 18.2                 | 18.2                          | 20.2               |
| Career change and development opportunities                   | 10.3                                      | 12.6                 | 9.6                           | 11.2               |
| Other                                                         | 10.3                                      | 11.2                 | 9.4                           | 9.2                |
| More involvement in direct patient care                       | 3.4                                       | 3.5                  | 12.5                          | 7.7                |
| Less involvement in direct patient care                       | 8.6                                       | 5.6                  | 2.9                           | 5.6                |

Table shows specialties with over 100 respondents.

For numbers corresponding to percentages, and numbers for small number specialties, see Appendix 2.

\*Specialty comparisons on each row of the table ( $\chi^2_3$  tests):  $p < 0.001$ .

Significantly high or low percentages are indicated in **bold**.

Appendix 1: Factors contributing to retirement decisions by specialty: numbers who selected each factor

| Factor contributing to retirement decisions                 | Hospital medical specialties (N=237) |    | Surgery (N=206) |    | General practice (N=1249) |    | Paediatrics (N=114) |    | Emergency medicine (N=19) |    | Obstetrics and gynaecology (N=45) |      | Anaesthetics (N=157) |   | Radiology (N=72) |   | Clinical oncology (N=25) |   | Pathology (N=119) |   | Psychiatry (N=147) |   | Total (N=2390) |   |
|-------------------------------------------------------------|--------------------------------------|----|-----------------|----|---------------------------|----|---------------------|----|---------------------------|----|-----------------------------------|------|----------------------|---|------------------|---|--------------------------|---|-------------------|---|--------------------|---|----------------|---|
|                                                             | n                                    | n  | n               | n  | n                         | n  | n                   | n  | n                         | n  | n                                 | n    | n                    | n | n                | n | n                        | n | n                 | n | n                  | n | n              | n |
| To increase time for leisure/other interests                | 131                                  | 93 | 656             | 54 | 5                         | 19 | 83                  | 42 | 9                         | 63 | 67                                | 1222 |                      |   |                  |   |                          |   |                   |   |                    |   |                |   |
| Pressure of work                                            | 77                                   | 59 | 645             | 47 | 10                        | 15 | 51                  | 34 | 10                        | 50 | 55                                | 1053 |                      |   |                  |   |                          |   |                   |   |                    |   |                |   |
| Reduced job satisfaction                                    | 82                                   | 91 | 557             | 46 | 7                         | 16 | 61                  | 22 | 7                         | 42 | 67                                | 998  |                      |   |                  |   |                          |   |                   |   |                    |   |                |   |
| To maintain good health                                     | 70                                   | 61 | 434             | 28 | 5                         | 17 | 58                  | 21 | 9                         | 27 | 46                                | 776  |                      |   |                  |   |                          |   |                   |   |                    |   |                |   |
| Financial security/insufficient financial incentive to stay | 64                                   | 64 | 375             | 25 | 4                         | 13 | 54                  | 22 | 8                         | 29 | 52                                | 710  |                      |   |                  |   |                          |   |                   |   |                    |   |                |   |
| The prospect of revalidation                                | 52                                   | 39 | 333             | 26 | 4                         | 6  | 38                  | 14 | 2                         | 24 | 23                                | 561  |                      |   |                  |   |                          |   |                   |   |                    |   |                |   |
| Possibility of deteriorating skill/competence               | 23                                   | 33 | 253             | 18 | 6                         | 12 | 49                  | 12 | 3                         | 11 | 15                                | 435  |                      |   |                  |   |                          |   |                   |   |                    |   |                |   |
| Other                                                       | 51                                   | 41 | 164             | 24 | 3                         | 7  | 27                  | 12 | 11                        | 24 | 35                                | 399  |                      |   |                  |   |                          |   |                   |   |                    |   |                |   |
| Not wanting to do out-of-hours work                         | 31                                   | 61 | 122             | 19 | 4                         | 19 | 46                  | 37 | 3                         | 19 | 21                                | 382  |                      |   |                  |   |                          |   |                   |   |                    |   |                |   |
| Retirement of spouse/ partner                               | 44                                   | 17 | 207             | 22 | 0                         | 2  | 22                  | 11 | 2                         | 20 | 19                                | 366  |                      |   |                  |   |                          |   |                   |   |                    |   |                |   |
| Family reasons                                              | 44                                   | 29 | 188             | 22 | 1                         | 3  | 14                  | 8  | 8                         | 11 | 17                                | 345  |                      |   |                  |   |                          |   |                   |   |                    |   |                |   |
| Poor health                                                 | 21                                   | 18 | 144             | 11 | 5                         | 3  | 12                  | 10 | 2                         | 17 | 14                                | 257  |                      |   |                  |   |                          |   |                   |   |                    |   |                |   |
| None of the above – I just wanted to retire                 | 13                                   | 12 | 94              | 11 | 3                         | 2  | 7                   | 7  | 2                         | 8  | 8                                 | 167  |                      |   |                  |   |                          |   |                   |   |                    |   |                |   |

Appendix 2: Factors that would encourage doctors to stay working in medicine for longer, by speciality: numbers who selected each factor

| Factor encouraging doctors to stay                            | Hospital medical specialities (N=174) |    | General practice (N=384) |    | Paediatrics (N=40) |    | Emergency medicine (N=9) |    | Obstetrics and gynaecology (N=31) |    | Anaesthetics (N=53) |     | Radiology (N=36) |   | Clinical oncology (N=19) |   | Pathology (N=37) |   | Psychiatry (N=40) |   | Total (N=966) |   |
|---------------------------------------------------------------|---------------------------------------|----|--------------------------|----|--------------------|----|--------------------------|----|-----------------------------------|----|---------------------|-----|------------------|---|--------------------------|---|------------------|---|-------------------|---|---------------|---|
|                                                               | n                                     | n  | n                        | n  | n                  | n  | n                        | n  | n                                 | n  | n                   | n   | n                | n | n                        | n | n                | n | n                 | n | n             | n |
| Reduced impact of work-related bureaucracy                    | 77                                    | 66 | 199                      | 21 | 4                  | 13 | 22                       | 21 | 6                                 | 13 | 15                  | 457 |                  |   |                          |   |                  |   |                   |   |               |   |
| Workload reduction/shorter hours                              | 77                                    | 61 | 161                      | 25 | 5                  | 13 | 23                       | 19 | 9                                 | 15 | 12                  | 420 |                  |   |                          |   |                  |   |                   |   |               |   |
| Financial incentivisation                                     | 48                                    | 47 | 94                       | 12 | 2                  | 8  | 17                       | 19 | 7                                 | 9  | 9                   | 272 |                  |   |                          |   |                  |   |                   |   |               |   |
| Reduction of on-call or emergency commitments                 | 44                                    | 47 | 58                       | 18 | 5                  | 12 | 22                       | 13 | 5                                 | 6  | 9                   | 239 |                  |   |                          |   |                  |   |                   |   |               |   |
| None of these                                                 | 34                                    | 27 | 98                       | 5  | 2                  | 8  | 14                       | 5  | 4                                 | 12 | 15                  | 224 |                  |   |                          |   |                  |   |                   |   |               |   |
| Improved working conditions, other than (or as well as) hours | 34                                    | 26 | 70                       | 9  | 2                  | 10 | 9                        | 13 | 5                                 | 10 | 7                   | 195 |                  |   |                          |   |                  |   |                   |   |               |   |
| Career change and development opportunities                   | 18                                    | 18 | 37                       | 7  | 2                  | 5  | 4                        | 5  | 5                                 | 6  | 1                   | 108 |                  |   |                          |   |                  |   |                   |   |               |   |
| Other                                                         | 18                                    | 16 | 36                       | 3  | 0                  | 1  | 4                        | 1  | 4                                 | 3  | 3                   | 89  |                  |   |                          |   |                  |   |                   |   |               |   |
| More involvement in direct patient care                       | 6                                     | 5  | 48                       | 3  | 2                  | 2  | 2                        | 2  | 1                                 | 1  | 2                   | 74  |                  |   |                          |   |                  |   |                   |   |               |   |
| Less involvement in direct patient care                       | 15                                    | 8  | 11                       | 4  | 2                  | 3  | 2                        | 0  | 4                                 | 3  | 2                   | 54  |                  |   |                          |   |                  |   |                   |   |               |   |

**Factors influencing the decisions of senior UK doctors to retire or remain in medicine:  
national surveys of the UK-trained medical graduates of 1974 and 1977**

Fay Smith, Shelly Lachish, Michael J Goldacre, Trevor W Lambert

STROBE Statement

|                              | Item No | Recommendation                                                                                                                                                                                    |      |
|------------------------------|---------|---------------------------------------------------------------------------------------------------------------------------------------------------------------------------------------------------|------|
| <b>Title and abstract</b>    | 1       | (a) Indicate the study's design with a commonly used term in the title or the abstract                                                                                                            | DONE |
|                              |         | (b) Provide in the abstract an informative and balanced summary of what was done and what was found                                                                                               | DONE |
| <b>Introduction</b>          |         |                                                                                                                                                                                                   |      |
| Background/rationale         | 2       | Explain the scientific background and rationale for the investigation being reported                                                                                                              | DONE |
| Objectives                   | 3       | State specific objectives, including any prespecified hypotheses                                                                                                                                  | DONE |
| <b>Methods</b>               |         |                                                                                                                                                                                                   |      |
| Study design                 | 4       | Present key elements of study design early in the paper                                                                                                                                           | DONE |
| Setting                      | 5       | Describe the setting, locations, and relevant dates, including periods of recruitment, exposure, follow-up, and data collection                                                                   | DONE |
| Participants                 | 6       | (a) Give the eligibility criteria, and the sources and methods of selection of participants. Describe methods of follow-up                                                                        | DONE |
|                              |         | (b) For matched studies, give matching criteria and number of exposed and unexposed                                                                                                               | N/A  |
| Variables                    | 7       | Clearly define all outcomes, exposures, predictors, potential confounders, and effect modifiers. Give diagnostic criteria, if applicable                                                          | DONE |
| Data sources/<br>measurement | 8*      | For each variable of interest, give sources of data and details of methods of assessment (measurement). Describe comparability of assessment methods if there is more than one group              | DONE |
| Bias                         | 9       | Describe any efforts to address potential sources of bias                                                                                                                                         | DONE |
| Study size                   | 10      | Explain how the study size was arrived at                                                                                                                                                         | DONE |
| Quantitative<br>variables    | 11      | Explain how quantitative variables were handled in the analyses. If applicable, describe which groupings were chosen and why                                                                      | DONE |
| Statistical methods          | 12      | (a) Describe all statistical methods, including those used to control for confounding                                                                                                             | DONE |
|                              |         | (b) Describe any methods used to examine subgroups and interactions                                                                                                                               | DONE |
|                              |         | (c) Explain how missing data were addressed                                                                                                                                                       | DONE |
|                              |         | (d) If applicable, explain how loss to follow-up was addressed                                                                                                                                    | N/A  |
|                              |         | (e) Describe any sensitivity analyses                                                                                                                                                             | N/A  |
| <b>Results</b>               |         |                                                                                                                                                                                                   |      |
| Participants                 | 13*     | (a) Report numbers of individuals at each stage of study—eg numbers potentially eligible, examined for eligibility, confirmed eligible, included in the study, completing follow-up, and analysed | DONE |
|                              |         | (b) Give reasons for non-participation at each stage                                                                                                                                              | DONE |
|                              |         | (c) Consider use of a flow diagram                                                                                                                                                                | N/A  |
| Descriptive data             | 14*     | (a) Give characteristics of study participants (eg demographic, clinical, social) and information on exposures and potential confounders                                                          | DONE |
|                              |         | (b) Indicate number of participants with missing data for each variable of interest                                                                                                               | DONE |

|                          |     |                                                                                                                                                                                                              |      |
|--------------------------|-----|--------------------------------------------------------------------------------------------------------------------------------------------------------------------------------------------------------------|------|
|                          |     | (c) Summarise follow-up time (eg, average and total amount)                                                                                                                                                  | DONE |
| Outcome data             | 15* | Report numbers of outcome events or summary measures over time                                                                                                                                               | DONE |
| Main results             | 16  | (a) Give unadjusted estimates and, if applicable, confounder-adjusted estimates and their precision (eg, 95% confidence interval). Make clear which confounders were adjusted for and why they were included | DONE |
|                          |     | (b) Report category boundaries when continuous variables were categorized                                                                                                                                    | N/A  |
|                          |     | (c) If relevant, consider translating estimates of relative risk into absolute risk for a meaningful time period                                                                                             | N/A  |
| Other analyses           | 17  | Report other analyses done—eg analyses of subgroups and interactions, and sensitivity analyses                                                                                                               | DONE |
| <b>Discussion</b>        |     |                                                                                                                                                                                                              |      |
| Key results              | 18  | Summarise key results with reference to study objectives                                                                                                                                                     | DONE |
| Limitations              | 19  | Discuss limitations of the study, taking into account sources of potential bias or imprecision. Discuss both direction and magnitude of any potential bias                                                   | DONE |
| Interpretation           | 20  | Give a cautious overall interpretation of results considering objectives, limitations, multiplicity of analyses, results from similar studies, and other relevant evidence                                   | DONE |
| Generalisability         | 21  | Discuss the generalisability (external validity) of the study results                                                                                                                                        | DONE |
| <b>Other information</b> |     |                                                                                                                                                                                                              |      |
| Funding                  | 22  | Give the source of funding and the role of the funders for the present study and, if applicable, for the original study on which the present article is based                                                | DONE |

\*Give information separately for exposed and unexposed groups.

**Note:** An Explanation and Elaboration article discusses each checklist item and gives methodological background and published examples of transparent reporting. The STROBE checklist is best used in conjunction with this article (freely available on the Web sites of PLoS Medicine at <http://www.plosmedicine.org/>, Annals of Internal Medicine at <http://www.annals.org/>, and Epidemiology at <http://www.epidem.com/>). Information on the STROBE Initiative is available at <http://www.strobe-statement.org>.



# BMJ Open

## Factors influencing the decisions of senior UK doctors to retire or remain in medicine: national surveys of the UK-trained medical graduates of 1974 and 1977

|                                 |                                                                                                                                                                                                                                                                                                                                                                                                              |
|---------------------------------|--------------------------------------------------------------------------------------------------------------------------------------------------------------------------------------------------------------------------------------------------------------------------------------------------------------------------------------------------------------------------------------------------------------|
| Journal:                        | <i>BMJ Open</i>                                                                                                                                                                                                                                                                                                                                                                                              |
| Manuscript ID                   | bmjopen-2017-017650.R1                                                                                                                                                                                                                                                                                                                                                                                       |
| Article Type:                   | Research                                                                                                                                                                                                                                                                                                                                                                                                     |
| Date Submitted by the Author:   | 07-Jun-2017                                                                                                                                                                                                                                                                                                                                                                                                  |
| Complete List of Authors:       | Smith, Fay; University of Oxford, Nuffield Department of Population Health, Richard Doll Building, Old Road Campus<br>Lachish, Shelly; University of Oxford, Nuffield Dept Population Health<br>Goldacre, Michael; University of Oxford, Nuffield Department of Population Health, Richard Doll Building, Old Road Campus<br>Lambert, Trevor; University of Oxford, Nuffield Department of Population Health |
| <b>Primary Subject Heading</b>: | Health policy                                                                                                                                                                                                                                                                                                                                                                                                |
| Secondary Subject Heading:      | Health services research, Medical education and training                                                                                                                                                                                                                                                                                                                                                     |
| Keywords:                       | HEALTH SERVICES ADMINISTRATION & MANAGEMENT, Human resource management < HEALTH SERVICES ADMINISTRATION & MANAGEMENT, Health policy < HEALTH SERVICES ADMINISTRATION & MANAGEMENT                                                                                                                                                                                                                            |
|                                 |                                                                                                                                                                                                                                                                                                                                                                                                              |

SCHOLARONE™  
Manuscripts

Only

1  
2  
3 **Factors influencing the decisions of senior UK doctors to retire or remain in**  
4 **medicine: national surveys of the UK-trained medical graduates of 1974 and**  
5 **1977**  
6  
7

8  
9  
10 **Short title:** Factors influencing retirement decisions of senior UK doctors  
11

12  
13 Fay Smith, Shelly Lachish, Michael J Goldacre, Trevor W Lambert  
14

15  
16 UK Medical Careers Research Group, Unit of Health-Care Epidemiology, Nuffield  
17 Department of Population Health, University of Oxford, Old Road Campus, Oxford  
18 OX3 7LF  
19  
20

21  
22  
23 Corresponding author: Trevor Lambert (trevor.lambert@dph.ox.ac.uk; Telephone:  
24 01865 289389)  
25  
26

27  
28  
29 **Ethical approval:** National Research Ethics Service, following referral to the  
30 Brighton and Mid-Sussex Research Ethics Committee in its role as a multi-centre  
31 research ethics committee (ref 04/Q1907/48 amendment Am02 March 2015).  
32  
33  
34

35  
36 **Guarantor:** All authors are guarantors.  
37  
38

39  
40 **Contributorship:** TL and MJG designed and conducted the surveys. SL and FS  
41 performed the analysis and wrote the first drafts of the paper. All authors had full  
42 access to all of the data (including statistical reports and tables) in the study and take  
43 responsibility for the integrity of the data and the accuracy of the data analysis. All  
44 authors contributed to further drafts and all approved the final version.  
45  
46  
47

48  
49 **Transparency:** The lead author affirms that the manuscript is an honest, accurate,  
50 and transparent account of the study being reported; that no important aspects of the  
51 study have been omitted; and that any discrepancies from the study as planned have  
52 been explained.  
53  
54  
55

1  
2  
3 **Acknowledgements:** We thank Janet Justice and Alison Stockford for data entry.  
4 We are very grateful to all the doctors who participated in the surveys.  
5  
6

7  
8 **MeSH terms:** Attitude of health personnel; physicians; workforce; medical;  
9 retirement.  
10  
11  
12  
13  
14  
15  
16  
17  
18  
19  
20  
21  
22  
23  
24  
25  
26  
27  
28  
29  
30  
31  
32  
33  
34  
35  
36  
37  
38  
39  
40  
41  
42  
43  
44  
45  
46  
47  
48  
49  
50  
51  
52  
53  
54  
55  
56  
57  
58  
59  
60

For peer review only

**ABSTRACT**

**Objective:** To report attitudes to retirement of late-career doctors.

**Design:** Questionnaires sent in 2014 to all United Kingdom (UK) medical graduates of 1974 and 1977.

**Setting:** UK.

**Participants:** 3695 medical graduates.

**Main outcome measures:** Factors which influenced doctors' decisions to retire and factors which encouraged doctors to remain in work.

**Results:** The response rate was 85% (3695/4369). 55% of respondents overall were still working in medicine (whether they hadn't retired or had retired-and-returned; 61% of men, 43% of women). Of the retirees, 67% retired when they had originally planned to, and 28% had changed their retirement plans. Fifty per cent of retired doctors cited 'increased time for leisure/other interests' as a reason; 43% cited 'pressure of work'. Women (21%) were more likely than men (11%) to retire for family reasons. Women (27%) were more likely than men (9%) to retire because of the retirement of their spouse. General Practitioners (GPs) were more likely than doctors in other specialties to cite 'pressure of work'. Anaesthetists and GPs were more likely than doctors in other specialties to cite the 'possibility of deteriorating skill/competence'. Radiologists, surgeons, obstetricians and gynaecologists, and anaesthetists were most likely to cite 'not wanting to do out-of-hours work'.

Doctors who were still working were asked what would encourage them to stay in medicine for longer. Factors cited most frequently were 'reduced impact of work-related bureaucracy' (cited by 45%) and 'workload reduction/shorter hours' (42%). Men (30%) were more motivated than women (20%) by 'financial incentivisation'. Surgeons were most motivated by 'reduction of on-call or emergency commitments'.

**Conclusions:** Retention policy should address ways of optimising the clinical contribution of senior doctors whilst offering reduced workloads in the areas of bureaucracy and working hours, particularly in respect of emergency commitments.

[270 words]

## Strengths and limitations of this study

- This is a large nationwide study with a very high response rate.
- For retired doctors, the data are based upon actual retirements and not intentions.
- Doctors who have not yet retired were surveyed at a key stage for retirement planning.
- Although a large number of retired doctors responded, some may not have done, and there is a possibility of some responder bias.
- The small minority of non-contactable doctors largely comprised those who were unregistered, either through retirement or through having left medicine or the UK. It is possible that, if surveyed, their views on the topics of the paper would differ from those of the respondents.

### Funding:

This is an independent report commissioned and funded by the Policy Research Programme in the Department of Health (project number 016/0118). The views expressed are not necessarily those of the funding body.

**Competing interests:** All authors have completed the Unified Competing Interest form at [www.icmje.org/coi\\_disclosure.pdf](http://www.icmje.org/coi_disclosure.pdf) (available on request from the corresponding author) and all authors want to declare: (1) financial support for the submitted work from the policy research programme, Department of Health. All authors also declare: (2) no financial relationships with commercial entities that might have an interest in the submitted work; (3) no spouses, partners, or children with relationships with commercial entities that might have an interest in the submitted work; (4) no non-financial interests that may be relevant to the submitted work.

**Data sharing:** It may be possible for the authors to make tabulated data, produced in the course of this work but not included in the paper, available to interested readers on request.

## INTRODUCTION

When doctors retire, health services lose their experience, knowledge and support.[1] In the United Kingdom (UK) one in ten Specialty and Associate Specialist (SAS) doctors and General Practitioners (GPs) are aged over 60.[2] In 2015, over 80% of senior hospital doctors in the United Kingdom were considering early retirement, with stress identified as the main cause.[3] A survey of 1400 GPs by the Wessex Local Medical Committee showed that one fifth planned to retire early.[4] The early retirement of such experienced doctors creates challenges for the medical workforce, places more stress upon remaining staff and may adversely affect patient safety.[2, 3]

A recent survey of consultant physicians in the UK found that the most common reasons for retiring cited by these doctors included pressure of work, length of working hours and dissatisfaction with the National Health Service (NHS).[5] Interviews with GPs have identified further influences, including the following: ageing and health, family life, uncertainty about the future of primary care, concerns around revalidation, increased administrative burden, and lack of time with patients.[6, 7] A cohort of UK-trained doctors, across all specialties, in their early fifties revealed that these doctors considered early retirement for family/leisure reasons, and because of concerns about health, workload, and changes in the NHS.[8]

Much of the research focus on how to retain doctors nearing retirement has been on GPs. In interviews, GPs have suggested a need for reduced workload, a focus upon their own health, and improvements in morale.[6] Other research on retention of the GP workforce calls for a slower pace of administrative change and less work outside face-to-face patient care.[7] In one study, half of hospital consultants working in Scotland said they would postpone retirement if their workload reduced.[9]

We have studied the careers of the UK-trained medical qualifiers of 1974 and 1977 periodically from the first year after they qualified. In our latest survey we asked about retirement status, intentions to retire for those who had not already done so, and attitudes to retirement. The aim of this paper is to report on factors which had influenced the decision to retire and on factors that might encourage doctors to stay in medicine longer. We compared the replies of men and women, and of those working (or who had worked) in different specialties.

## METHODS

In 2014 the UK Medical Careers Research Group surveyed the UK medical graduates of 1974 and 1977 using identical postal and web-based questionnaires. Up to four reminders were sent to non-respondents. Further details of the methodology are available elsewhere [10].

The surveys sent to both cohorts were identical and comprised structured, 'closed' questions and statements, with scope and encouragement for additional free-text comment. Doctors were asked to indicate which one of seven phrases best described their current employment status: *working full-time in medicine; working part-time in medicine; working full-time outside medicine; working part-time outside medicine; retired, not now working in medicine; retired and 'returned' for some medical work; other.*

Retirees and doctors who had 'retired and returned', were asked to indicate which, if any, of the following factors had influenced their decision to retire when they did: *pressure of work; not wanting to do out-of-hours work; family reasons; to increase time for leisure/other interests; reduced job satisfaction; retirement of spouse/partner; financial security/insufficient financial incentive to stay; possibility of deteriorating skills/competence; the prospect of revalidation; poor health; to maintain good health; 'none of the above – I just wanted to retire'; other.*

Doctors still working in medicine (full or part-time) were asked 'Would any of the following factors encourage you to stay working in medicine longer?' Doctors could choose from one or more of the following factors: *workload reduction/shorter hours; reduction of on-call or emergency commitments; reduced impact of work-related bureaucracy; financial incentivisation; improved working conditions, other than (or as well as) hours; career change and development opportunities; more involvement in direct patient care; less involvement in direct patient care; none of these; other.*

In each case the list of response options offered was developed in part by studying text responses from doctors to previous surveys and in part by reviewing the literature on retirement and factors affecting retirement decisions.

We allocated a *career specialty* to each respondent using their recorded job history as reported to us in successive surveys and additional information about their specialist registration with the GMC as reported to us by the doctors in these surveys. For a small number of respondents we were unable to allocate a single career specialty, either because

1  
2  
3 we did not have sufficient data about the doctor's career, or because the doctor had worked  
4 in different specialties during their career. The career specialty allocation allowed us to  
5 analyse the responses and employment status of doctors in different specialties.  
6 Respondents were then grouped for analysis into these groups: *hospital medical specialties,*  
7 *surgical specialties, paediatrics, emergency medicine, obstetrics and gynaecology,*  
8 *anaesthesia, radiology, clinical oncology, pathology, psychiatry, and general practice / family*  
9 *medicine (GP).*  
10  
11  
12  
13

14  
15 The replies were analysed using  $\chi^2$  tests and Mann-Whitney U tests to explore differences in  
16 views towards retirement between men and women, between cohorts and between doctors  
17 working in different specialties. Statistical analysis was undertaken using SPSS version 22.  
18 Numbers of doctors were small in a few combinations of (for example) specialty and gender,  
19 but we report them for the record.  
20  
21  
22  
23  
24  
25  
26  
27  
28  
29  
30  
31  
32  
33  
34  
35  
36  
37  
38  
39  
40  
41  
42  
43  
44  
45  
46  
47  
48  
49  
50  
51  
52  
53  
54  
55  
56  
57  
58  
59  
60



## RESULTS

### Demographics and response rates

There were 5482 graduating doctors in the two year-of-graduation cohorts we studied: 1974 (2347 graduates) and 1977 (3135 graduates). These two cohorts graduated many years before the recent increase in the UK in the proportion of women among successive cohorts of UK medical graduates. In 1974 the graduation cohort was 73.2% male (1717/2347), and the cohort of 1977 was 67.5% male (2116/3135).

Across both cohorts 677 doctors were not contactable, 210 were deceased, 70 had told us that they did not wish to participate, and 156 doctors who had never replied to any of our previous surveys were not contacted. The aggregated response rate of the remaining contactable doctors, over both surveys, was 84.6% (3695/4369). The response rate among men was 84.4% (2554/3026) and that among women was 85.0% (1141/1343). Taking the two cohorts together, the responders represent 70% of all surviving graduates and 85% of the contactable doctors. An abbreviated questionnaire which omitted some of the content reported here was completed by 98 graduates: we exclude these from further analysis.

The median age of the doctors from the cohorts at the time of the surveys was 64 (men 64, women 63) for the 1974 cohort and 61 (men 61, women 60) for the 1977 cohort.

### Current employment status

Over both cohorts, 44% (1572/3597) of respondents had retired from medicine and were no longer working in medicine (38% of men, 56% of women); 26% (935/3597) had retired and returned for some medical work (29% of men, 20% of women); and 29% (1043/3597) were still working in medicine (32% of men, 23% of women). Therefore, 55% of respondents overall were still working in medicine (whether they hadn't retired or had retired-and-returned; 61% of men, 43% of women). Over both cohorts, 0.8% were working outside medicine and 0.5% did not give their employment status.

### Retired, and retired and 'returned' doctors: circumstances of retirement

When asked 'What were the circumstances of your retirement?', most of the retired doctors (66.8%) had retired when they had planned to retire, while 27.7% had retired not when originally planned (14.0% due to changes in the work environment and 13.7% due to changes in personal circumstances; Table 1). Retired doctors from the 1974 cohort were a little more likely to have retired when they had planned to retire compared with the 1977 cohort. In comparing the responses of doctors in different specialties, we did not consider doctors in emergency medicine or clinical oncology for comparison, owing to small counts.

1  
2  
3 Radiologists were most likely to have retired when they had planned to retire (79.4%) and  
4 hospital medical specialists were least likely (62.4%; Table 1). Psychiatrists were most likely  
5 to report that their retirement was unplanned and due to a change in the work environment  
6 (21.3%). GPs were most likely to report that their retirement was unplanned and due to  
7 changes in personal circumstances (15.2%).  
8  
9

### 10 11 **Retired doctors: reasons for retiring**

12 When asked which factors had influenced their decision to retire, the retired doctors most  
13 frequently cited wanting 'increased time for leisure/other interests' as contributing to their  
14 decision to retire when they did (50.4%; Table 2). 'Pressure of work' was cited by 42.8%.  
15 Women were more likely than men to retire because of the retirement of a spouse or partner  
16 (Table 2). Further inspection within each specialty revealed that this gender difference was  
17 present in all specialties except Surgery, Obstetrics and gynaecology, Radiology, Pathology,  
18 and Psychiatry: while more women than men in these specialties cited 'Retirement of a  
19 spouse/partner', these differences within each of these specialties were not significant. In  
20 General practice 28.4% of women cited this reason compared with 10.4% of men.  
21  
22  
23  
24  
25  
26  
27  
28

29 Overall, women were more likely than men to retire for family reasons (Table 2): this  
30 difference was most pronounced among GPs (cited by 20.7% of women and 12.2% of men;  
31  $p < 0.001$ ) and Hospital medical specialists (cited by 30.6% of women and 13.3% of men,  
32  $p < 0.01$ ). Men were more likely than women to retire for financial reasons. This difference  
33 was significant within both cohorts. Further inspection within each specialty grouping  
34 revealed that this gender difference was only present among GPs (men GPs: 33.3%, women  
35 GPs: 23.7%).  
36  
37  
38  
39  
40

41 Men were also more likely than women to retire because they did not want to do out-of-hours  
42 work: this difference was most marked amongst hospital medical specialists (men 16.4%,  
43 women 5.6%) and paediatricians (men 26.7%, women 10.1%), and was significant within  
44 both cohorts.  
45  
46  
47

48 Retired doctors from the younger 1977 cohort were significantly more likely than doctors  
49 from the 1974 cohort to have retired due to pressure of work (36.4% 1974, 48.3% 1977),  
50 reduced job satisfaction (35.8% 1974, 45.9% 1977), or for financial reasons (25.3% 1974,  
51 32.4% 1977). This suggests that these factors are more relevant to decisions about early  
52 retirement.  
53  
54  
55  
56  
57  
58  
59  
60

1  
2  
3 Retired GPs were more likely to cite 'pressure of work' as a reason for retiring than doctors  
4 in other specialties (Table 3). Anaesthetists and GPs were more likely to cite the 'possibility  
5 of deteriorating skill/competence' than doctors in other specialties. Radiologists, surgeons,  
6 obstetricians and gynaecologists, and anaesthetists were more likely to cite 'not wanting to  
7 do out-of-hours work' compared with doctors in other specialties. This pattern of reasons for  
8 retirement was observed in both cohorts ( $p < 0.001$ ). For numbers corresponding to the  
9 percentages in Table 3, and numbers for small number specialties, see Appendix 1.  
10  
11  
12  
13

### 14 **Doctors still working: retirement plans**

15  
16 The doctors still working were asked which factors would encourage them to stay in  
17 medicine for longer. These doctors most frequently cited 'reduced impact of work-related  
18 bureaucracy' as a factor that would encourage them to stay working in medicine for longer  
19 (45.4%; Table 4), and 'workload reduction/shorter hours' (42.2%). Men were more likely than  
20 women to be encouraged by 'financial incentivisation'. This difference was significant within  
21 both cohorts ( $p < 0.05$ ). Doctors from the 1977 cohort were significantly more likely than  
22 doctors from the 1974 cohort to be encouraged to remain by 'workload reduction/shorter  
23 hours' (32.5% 1974, 46.6% 1977) and 'improved working conditions' (14.0% 1974, 22.8%  
24 1977).  
25  
26  
27  
28  
29  
30  
31

32 There was little variation by specialty grouping in the scoring of factors which would  
33 encourage doctors to stay in medicine longer (Table 5). There was significant variation on  
34 only one factor: reduction of on call or emergency commitments was assigned more  
35 importance by surgeons than by others. For numbers corresponding to the percentages in  
36 Table 5, and numbers for small number specialties, see Appendix 2.  
37  
38  
39  
40  
41  
42  
43  
44  
45  
46  
47  
48  
49  
50  
51  
52  
53  
54  
55  
56  
57  
58  
59  
60

## DISCUSSION

### Main findings

Over half of the respondents were still working in medicine (whether having retired and returned, or having never retired). Of those doctors who had retired, two thirds had retired when they had planned to retire and one quarter had an unplanned retirement due to either a change in the work environment or a change in personal circumstances. Doctors retired mainly to spend more time on leisure and other interests, or due to work pressures. More women than men retired because of the retirement of a spouse or partner: this difference was pronounced in General Practice, and less pronounced in specialties such as Surgery. More women than men retired due to family reasons (especially among GPs and Hospital medical specialists). Thus, not only are female doctors influenced much more than men by family factors in their career decisions when they are young,[11] but the male-female differences, in respect of family and career decisions, persist with age into their sixties. More men GPs than women GPs retired for financial reasons, citing '*financial security/insufficient financial incentive to stay*'. More men than women in the hospital medical specialties and paediatrics cited retiring because they did not want to do out-of-hours work. Certain retirement factors were cited more by the younger 1977 cohort than the 1974 cohort (pressure of work, reduced job satisfaction, financial reasons), suggesting that doctors considering early retirement are more influenced by these factors.

There were differences between specialties. More GPs cited 'pressure of work', more anaesthetists and GPs cited the 'possibility of deteriorating skill/competence', and more radiologists, surgeons, obstetricians and anaesthetists cited 'not wanting to do out-of-hours work' compared with doctors in other specialties.

The doctors still working cited two main factors that would encourage them to stay working in medicine for longer: 'reduced impact of work-related bureaucracy' and 'workload reduction/shorter hours'. More men than women could be encouraged to remain in medicine by financial incentivisation. More surgeons cited a reduction of on call or emergency commitments as influential to a future decision to stay.

### Strengths and limitations

This is a large study with a very high response rate among contactable doctors (85%). In the case of the retired doctors in our study the data are based upon actual retirements and not intentions. In the case of the doctors who have not yet retired, we ask about factors that might encourage them to stay at a key stage when these doctors are typically considering retirement, therefore their answers are gathered at an optimal time. As has been mentioned

1  
2  
3 elsewhere, retired, though contactable, doctors may be less likely to respond.[1] This may be  
4 for a variety of reasons including deteriorating health. The non-contactable doctors largely  
5 comprised those who had ceased GMC registration, either through retirement or through  
6 having left medicine or the UK. It is possible that, if surveyed, their views on the topics of the  
7 paper would differ from those of the respondents.  
8  
9

### 10 11 12 **Comparison with existing literature**

13 We found that a desire to spend more time on leisure/other interests and pressure of work  
14 were key factors in retirement decisions for the retired doctors we surveyed. A recent UK  
15 study found that 81% of senior hospital doctors were considering retiring earlier due to work  
16 pressures;[3] similarly, the most common reason for intended early retirement cited by UK  
17 consultants is pressure of work.[5] Family reasons and leisure time were the main reasons  
18 cited by senior UK doctors when considering early retirement.[8] A systematic review of  
19 retirement planning among doctors found that workload and burnout were the most common  
20 reasons provided for early retirement.[12] A 2015 literature review of occupational health  
21 issues amongst UK doctors [13] revealed interesting findings which concurred with our  
22 observed specialty differences among senior doctors. Stress and burnout were widely  
23 reported across specialties, though the reported levels of problems varied. For example, one  
24 referenced study showed that radiologists reported particularly high levels of job-related  
25 exhaustion compared to surgeons, oncologists and gastroenterologists.[14]  
26  
27  
28  
29  
30  
31  
32  
33  
34

35 Our finding that more GPs cited 'pressure of work' than doctors in other specialties, is  
36 consistent with other research which has found that GPs are concerned about high  
37 workloads.[6]  
38  
39

40 We found that doctors could be encouraged to stay in practice by reducing work-related  
41 bureaucracy and reducing workload/hours. Other research has found that doctors can be  
42 encouraged to stay working in medicine by reducing workplace frustration and workload  
43 pressure.[12]  
44  
45  
46  
47

48 **Further work** The results reported here cover only some of the themes explored by us in  
49 these surveys. We asked specific questions about any adverse effects on health and  
50 wellbeing of work as a doctor, published elsewhere.[15] We also asked the doctors about  
51 their roles in addition to clinical work, specifying 'teaching and training, research,  
52 management' and 'other (please describe)'. In addition to our closed questions, we asked for  
53 some 'free text' responses to questions about changes in policy and practice that  
54  
55  
56  
57  
58  
59  
60

respondents would like implemented in medicine in the UK. We are in the process of analysing responses and, in further work, we will publish on these.

**Implications / conclusions** Doctors described a variety of professional and personal motivators for choosing the timing of their retirement. Some of the reasons given may be amenable to policy initiatives, which could result in securing a longer contribution to the health service by some doctors than would otherwise be the case. Retention policy should address ways of optimising the clinical contribution of senior doctors. For example, staged retirement with reduced workloads in the areas of bureaucracy and working hours, particularly in respect of emergency commitments, may enable seniors to continue using their skills for longer.

A higher percentage of women than men had retired. As noted in Results, these were cohorts in which the majority of doctors were men: they pre-dated the substantial increase in the intake of women into medicine. If the male-female differences in the likelihood of early retirement become evident in younger generations of doctors, these may become an important source of future attrition from the medical workforce overall.

[2526 words]

## REFERENCES

1. Joyce, C.M., W.C. Wang, and H.M. McDonald, *Retirement patterns of Australian doctors aged 65 years and older*. Australian Health Review, 2015. **39**(5): p. 582-587.
2. British Medical Association, *2014 UK Medical Workforce Briefing*. 2014, British Medical Association: London.
3. Hospital Consultants and Specialists Association, *Who cares for the carers? The impact of workplace stress on senior hospital doctors*. 2015, Hospital Consultants and Specialists Association: London.
4. British Medical Association. *Survey reveals extent of GP workforce crisis*. <https://www.bma.org.uk/news/2014/may/survey-reveals-extent-of-gp-workforce-crisis> 2014 [cited Accessed 17th Nov 2016 Accessed 17th Nov 2016]; Available from: <https://www.bma.org.uk/news/2014/may/survey-reveals-extent-of-gp-workforce-crisis>.
5. Royal College of Physicians, *Census of consultant physicians and higher specialty trainees in the UK 2014-15*. 2016, Royal Colleges of Physicians: London.
6. Sansom, A., et al., *Understanding quit decisions in primary care: A qualitative study of older GPs*. BMJ Open, 2016. **6**(2): p. e010592.
7. Doran, N., et al., *Lost to the NHS: A mixed methods study of why GPs leave practice early in England*. British Journal of General Practice, 2016. **66**(643): p. e128-e134.
8. Taylor, K., T. Lambert, and M. Goldacre, *Future career plans of a cohort of senior doctors working in the National Health Service*. Journal of the Royal Society of Medicine, 2008. **101**(4): p. 182-190.
9. French, F.H., et al., *Consultants in NHS Scotland: A survey of work commitments, remuneration, job satisfaction and retirement plans*. Scottish Medical Journal, 2004. **49**(2): p. 47-52.
10. Lambert, T. and M. Goldacre, *Participation in medicine by graduates of medical schools in the United Kingdom up to 25 years post graduation: National cohort surveys*. Academic Medicine, 2013. **88**(5): p. 699-709.
11. Smith, F., T.W. Lambert, and M.J. Goldacre, *Factors influencing junior doctors' choices of future specialty: trends over time and demographics based on results from UK national surveys*. J R Soc Med, 2015. **108**(10): p. 396-405.
12. Silver, M.P., et al., *A systematic review of physician retirement planning*. Human Resources for Health, 2016. **14**(1): p. 67.
13. Vijendren, A., M. Yung, and J. Sanchez, *Occupational health issues amongst UK doctors: a literature review*. Occup Med (Lond), 2015. **65**(7): p. 519-28.
14. Ramirez, A.J., et al., *Mental health of hospital consultants: the effects of stress and satisfaction at work*. Lancet, 1996. **347**(9003): p. 724-8.

1  
2  
3  
4  
5  
6  
7  
8  
9  
10  
11  
12  
13  
14  
15  
16  
17  
18  
19  
20  
21  
22  
23  
24  
25  
26  
27  
28  
29  
30  
31  
32  
33  
34  
35  
36  
37  
38  
39  
40  
41  
42  
43  
44  
45  
46  
47  
48  
49  
50  
51  
52  
53  
54  
55  
56  
57  
58  
59  
60

15. Smith, F., M.J. Goldacre, and T.W. Lambert, *Adverse effects on health and wellbeing of working as a doctor: views of the UK medical graduates of 1974 and 1977 surveyed in 2014*. J R Soc Med, 2017. **110**(5): p. 198-207.

For peer review only



Table 1: Responses to the question 'What were the circumstances of your retirement?': retired and 'retired and returned' doctors from the 1974 and 1977 cohorts

| Respondents                  | I retired when I had planned to retire |      | It was unplanned and due to a change in the work environment |     | It was unplanned and due to changes in personal circumstances |     | Other |     | Total (100%)<br>N |
|------------------------------|----------------------------------------|------|--------------------------------------------------------------|-----|---------------------------------------------------------------|-----|-------|-----|-------------------|
|                              | %                                      | n    | %                                                            | n   | %                                                             | n   | %     | n   |                   |
| All                          | 66.8                                   | 1608 | 14.0                                                         | 336 | 13.7                                                          | 329 | 5.5   | 133 | 2406              |
| Retirement status            |                                        |      |                                                              |     |                                                               |     |       |     |                   |
| Retired                      | 65.4                                   | 1009 | 13.6                                                         | 209 | 16.3                                                          | 251 | 4.7   | 73  | 1542              |
| Retired and returned         | 69.3                                   | 599  | 14.7                                                         | 127 | 9.0                                                           | 78  | 6.9   | 60  | 864               |
| Cohort                       |                                        |      |                                                              |     |                                                               |     |       |     |                   |
| 1974 graduates               | 69.3                                   | 762  | 13.0                                                         | 143 | 11.9                                                          | 131 | 5.7   | 63  | 1099              |
| 1977 graduates               | 64.7                                   | 846  | 14.8                                                         | 193 | 15.1                                                          | 198 | 5.4   | 70  | 1307              |
| Gender                       |                                        |      |                                                              |     |                                                               |     |       |     |                   |
| Men                          | 68.4                                   | 1091 | 13.1                                                         | 209 | 12.7                                                          | 203 | 5.7   | 91  | 1594              |
| Women                        | 63.7                                   | 517  | 15.6                                                         | 127 | 15.5                                                          | 126 | 5.2   | 42  | 812               |
| Specialty group              |                                        |      |                                                              |     |                                                               |     |       |     |                   |
| Hospital medical specialties | 62.4                                   | 141  | 13.3                                                         | 30  | 14.6                                                          | 33  | 9.7   | 22  | 226               |
| Surgery                      | 71.3                                   | 139  | 13.8                                                         | 27  | 12.3                                                          | 24  | 2.6   | 5   | 195               |
| General practice             | 67.1                                   | 809  | 13.4                                                         | 162 | 15.2                                                          | 183 | 4.3   | 52  | 1206              |
| Paediatrics                  | 66.1                                   | 72   | 12.8                                                         | 14  | 13.8                                                          | 15  | 7.3   | 8   | 109               |
| Emergency medicine           | 77.8                                   | 14   | 0.0                                                          | 0   | 22.2                                                          | 4   | 0.0   | 0   | 18                |
| Obstetrics and gynaecology   | 75.0                                   | 30   | 12.5                                                         | 5   | 10.0                                                          | 4   | 2.5   | 1   | 40                |
| Anaesthetics                 | 71.7                                   | 109  | 12.5                                                         | 19  | 9.2                                                           | 14  | 6.6   | 10  | 152               |
| Radiology                    | 79.4                                   | 54   | 8.8                                                          | 6   | 4.4                                                           | 3   | 7.4   | 5   | 68                |
| Clinical oncology            | 62.5                                   | 15   | 4.2                                                          | 1   | 20.8                                                          | 5   | 12.5  | 3   | 24                |
| Pathology                    | 67.5                                   | 77   | 16.7                                                         | 19  | 8.8                                                           | 10  | 7.0   | 8   | 114               |
| Psychiatry                   | 61.7                                   | 87   | 21.3                                                         | 30  | 7.8                                                           | 11  | 9.2   | 13  | 141               |

Chi-square tests for: Retirement status ( $\chi^2_3=28.0$ ,  $p<0.001$ ), Cohort ( $\chi^2_3=7.9$ ,  $p=0.048$ ), Gender ( $\chi^2_3=7.6$ ,  $p=0.54$ ), Specialty group ( $\chi^2_{30}=56.4$ ,  $p=0.002$ ). 1974 graduates by specialty group ( $\chi^2_{30}=34.4$ ,  $p=0.264$ ), 1977 graduates by specialty group ( $\chi^2_{30}=44.7$ ,  $p=0.041$ ). 1974 graduates by gender ( $\chi^2_3=3.3$ ,  $p=0.348$ ), 1977 graduates by gender ( $\chi^2_3=3.5$ ,  $p=0.318$ ). Within each specialty group, by gender, only anaesthetics was significant ( $\chi^2_3=11.3$ ,  $p=0.010$ ).

Table 2: Doctors who have retired: self-reported factors contributing to their wish to retire

| Factor                                                       | Men (N=1663) |     | Women (N=844) |     | Total (N=2507) |      |
|--------------------------------------------------------------|--------------|-----|---------------|-----|----------------|------|
|                                                              | %            | n   | %             | n   | %              | n    |
| To increase time for leisure/other interests                 | 51.2         | 852 | 48.8          | 412 | 50.4           | 1264 |
| Pressure of work                                             | 42.3         | 704 | 43.8          | 370 | 42.8           | 1074 |
| Reduced job satisfaction                                     | 41.4         | 689 | 41.0          | 346 | 41.3           | 1035 |
| To maintain good health                                      | 32.5         | 540 | 30.6          | 258 | 31.8           | 798  |
| Financial security/insufficient financial incentive to stay* | 32.1         | 533 | 23.5          | 198 | 29.2           | 731  |
| The prospect of revalidation                                 | 22.9         | 380 | 23.7          | 200 | 23.1           | 580  |
| Possibility of deteriorating skill/competence                | 18.0         | 299 | 16.9          | 143 | 17.6           | 442  |
| Other                                                        | 17.1         | 285 | 17.2          | 145 | 17.2           | 430  |
| Not wanting to do out-of-hours work*                         | 18.2         | 302 | 10.7          | 90  | 15.6           | 392  |
| Retirement of spouse/ partner*                               | 9.4          | 156 | 26.5          | 224 | 15.2           | 380  |
| Family reasons*                                              | 11.4         | 189 | 20.9          | 176 | 14.6           | 365  |
| Poor health                                                  | 11.5         | 191 | 9.6           | 81  | 10.8           | 272  |
| None of the above – I just wanted to retire                  | 6.9          | 115 | 8.1           | 68  | 7.3            | 183  |

\*Gender comparisons on each row of the table ( $\chi^2_1$  tests):  $p < 0.001$ .  
 Respondents could select all that applied to them.

Table 3: Factors contributing to retirement decisions by specialty

| Factor                                                      | Specialty group                         |                    |                              |                        |                         |                      |                       | Total<br>(N=2229) |
|-------------------------------------------------------------|-----------------------------------------|--------------------|------------------------------|------------------------|-------------------------|----------------------|-----------------------|-------------------|
|                                                             | Hospital medical specialties<br>(N=237) | Surgery<br>(N=206) | General practice<br>(N=1249) | Paediatrics<br>(N=114) | Anaesthetics<br>(N=157) | Pathology<br>(N=119) | Psychiatry<br>(N=147) |                   |
| To increase time for leisure/other interests                | 55.3                                    | 45.1               | 52.5                         | 47.4                   | 52.9                    | 52.9                 | 45.6                  | 51.5              |
| Pressure of work*                                           | <b>32.5</b>                             | <b>28.6</b>        | <b>51.6</b>                  | 41.2                   | <b>32.5</b>             | 42.0                 | 37.4                  | 44.1              |
| Reduced job satisfaction                                    | 34.6                                    | 44.2               | 44.6                         | 40.4                   | 38.9                    | 35.3                 | 45.6                  | 42.4              |
| To maintain good health                                     | 29.5                                    | 29.6               | 34.7                         | 24.6                   | 36.9                    | 22.7                 | 31.3                  | 32.5              |
| Financial security/insufficient financial incentive to stay | 27.0                                    | 31.1               | 30.0                         | 21.9                   | 34.4                    | 24.4                 | 35.4                  | 29.7              |
| The prospect of revalidation                                | 21.9                                    | 18.9               | 26.7                         | 22.8                   | 24.2                    | 20.2                 | 15.6                  | 24.0              |
| Possibility of deteriorating skill/competence*              | <b>9.7</b>                              | 16.0               | <b>20.3</b>                  | 15.8                   | <b>31.2</b>             | 9.2                  | 10.2                  | 18.0              |
| Other*                                                      | 21.5                                    | 19.9               | <b>13.1</b>                  | 21.1                   | 17.2                    | 20.2                 | 23.8                  | 16.4              |
| Not wanting to do out-of-hours work*                        | 13.1                                    | <b>29.6</b>        | <b>9.8</b>                   | 16.7                   | <b>29.3</b>             | 16.0                 | 14.3                  | 14.3              |
| Retirement of spouse/ partner                               | 18.6                                    | 8.3                | 16.6                         | 19.3                   | 14.0                    | 16.8                 | 12.9                  | 15.7              |
| Family reasons                                              | 18.6                                    | 14.1               | 15.1                         | 19.3                   | 8.9                     | 9.2                  | 11.6                  | 14.6              |
| Poor health                                                 | 8.9                                     | 8.7                | 11.5                         | 9.6                    | 7.6                     | 14.3                 | 9.5                   | 10.6              |
| None of the above – I just wanted to retire                 | 5.5                                     | 5.8                | 7.5                          | 9.6                    | 4.5                     | 6.7                  | 5.4                   | 6.9               |

Table shows specialties with over 100 respondents.

For numbers corresponding to percentages, and numbers for small number specialties, see Appendix 1.

\*Specialty comparisons on each row of the table ( $\chi^2_6$  tests):  $p < 0.001$ .

Significantly high or low percentages are indicated in **bold**.

Table 4: Factors that would encourage doctors to stay working in medicine for longer, for men and women

| Factor encouraging doctors to stay                            | Men (N=790) |     | Women (N=253) |     | Total (N=1043) |     |
|---------------------------------------------------------------|-------------|-----|---------------|-----|----------------|-----|
|                                                               | n           | %   | n             | %   | n              | %   |
| Reduced impact of work-related bureaucracy                    | 44.9        | 355 | 47.0          | 119 | 45.4           | 474 |
| Workload reduction/shorter hours                              | 42.8        | 338 | 40.3          | 102 | 42.2           | 440 |
| Financial incentivisation*                                    | 29.6        | 234 | 20.2          | 51  | 27.3           | 285 |
| None of these                                                 | 24.1        | 190 | 22.5          | 57  | 23.7           | 247 |
| Reduction of on-call or emergency commitments                 | 25.2        | 199 | 18.6          | 47  | 23.6           | 246 |
| Improved working conditions, other than (or as well as) hours | 19.0        | 150 | 23.3          | 59  | 20.0           | 209 |
| Career change and development opportunities                   | 11.4        | 90  | 11.5          | 29  | 11.4           | 119 |
| Other                                                         | 9.0         | 71  | 11.5          | 29  | 9.6            | 100 |
| More involvement in direct patient care                       | 7.6         | 60  | 7.5           | 19  | 7.6            | 79  |
| Less involvement in direct patient care                       | 5.2         | 41  | 5.5           | 14  | 5.3            | 55  |

\*Gender comparisons on each row of the table ( $\chi^2_1$  tests):  $p < 0.01$ .

Table 5: Factors that would encourage doctors to stay working in medicine for longer, by specialty

| Factor encouraging doctors to stay                            | Hospital medical specialties (N=174)<br>% | Surgery (N=143)<br>% | General practice (N=384)<br>% | Total (N=701)<br>% |
|---------------------------------------------------------------|-------------------------------------------|----------------------|-------------------------------|--------------------|
| Reduced impact of work-related bureaucracy                    | 44.3                                      | 46.2                 | 51.8                          | 47.3               |
| Workload reduction/shorter hours                              | 44.3                                      | 42.7                 | 41.9                          | 43.5               |
| Financial incentivisation                                     | 27.6                                      | 32.9                 | 24.5                          | 28.2               |
| Reduction of on-call or emergency commitments*                | 25.3                                      | <b>32.9</b>          | 15.1                          | 24.7               |
| None of these                                                 | 19.5                                      | 18.9                 | 25.5                          | 23.2               |
| Improved working conditions, other than (or as well as) hours | 19.5                                      | 18.2                 | 18.2                          | 20.2               |
| Career change and development opportunities                   | 10.3                                      | 12.6                 | 9.6                           | 11.2               |
| Other                                                         | 10.3                                      | 11.2                 | 9.4                           | 9.2                |
| More involvement in direct patient care                       | 3.4                                       | 3.5                  | 12.5                          | 7.7                |
| Less involvement in direct patient care                       | 8.6                                       | 5.6                  | 2.9                           | 5.6                |

Table shows specialties with over 100 respondents.

For numbers corresponding to percentages, and numbers for small number specialties, see Appendix 2.

\*Specialty comparisons on each row of the table ( $\chi^2_3$  tests):  $p < 0.001$ .

Significantly high or low percentages are indicated in **bold**.

Appendix 1: Factors contributing to retirement decisions by specialty: numbers who selected each factor

| Factor contributing to retirement decisions                 | Specialty                            |                 |                           |                     |                           |                                   |                      |                  |                          |                   |                    | Total (N=2390) |
|-------------------------------------------------------------|--------------------------------------|-----------------|---------------------------|---------------------|---------------------------|-----------------------------------|----------------------|------------------|--------------------------|-------------------|--------------------|----------------|
|                                                             | Hospital medical specialties (N=237) | Surgery (N=206) | General practice (N=1249) | Paediatrics (N=114) | Emergency medicine (N=19) | Obstetrics and gynaecology (N=45) | Anaesthetics (N=157) | Radiology (N=72) | Clinical oncology (N=25) | Pathology (N=119) | Psychiatry (N=147) |                |
|                                                             | n                                    | n               | n                         | n                   | n                         | n                                 | n                    | n                | n                        | n                 | n                  | n              |
| To increase time for leisure/other interests                | 131                                  | 93              | 656                       | 54                  | 5                         | 19                                | 83                   | 42               | 9                        | 63                | 67                 | 1222           |
| Pressure of work                                            | 77                                   | 59              | 645                       | 47                  | 10                        | 15                                | 51                   | 34               | 10                       | 50                | 55                 | 1053           |
| Reduced job satisfaction                                    | 82                                   | 91              | 557                       | 46                  | 7                         | 16                                | 61                   | 22               | 7                        | 42                | 67                 | 998            |
| To maintain good health                                     | 70                                   | 61              | 434                       | 28                  | 5                         | 17                                | 58                   | 21               | 9                        | 27                | 46                 | 776            |
| Financial security/insufficient financial incentive to stay | 64                                   | 64              | 375                       | 25                  | 4                         | 13                                | 54                   | 22               | 8                        | 29                | 52                 | 710            |
| The prospect of revalidation                                | 52                                   | 39              | 333                       | 26                  | 4                         | 6                                 | 38                   | 14               | 2                        | 24                | 23                 | 561            |
| Possibility of deteriorating skill/competence               | 23                                   | 33              | 253                       | 18                  | 6                         | 12                                | 49                   | 12               | 3                        | 11                | 15                 | 435            |
| Other                                                       | 51                                   | 41              | 164                       | 24                  | 3                         | 7                                 | 27                   | 12               | 11                       | 24                | 35                 | 399            |
| Not wanting to do out-of-hours work                         | 31                                   | 61              | 122                       | 19                  | 4                         | 19                                | 46                   | 37               | 3                        | 19                | 21                 | 382            |
| Retirement of spouse/ partner                               | 44                                   | 17              | 207                       | 22                  | 0                         | 2                                 | 22                   | 11               | 2                        | 20                | 19                 | 366            |
| Family reasons                                              | 44                                   | 29              | 188                       | 22                  | 1                         | 3                                 | 14                   | 8                | 8                        | 11                | 17                 | 345            |
| Poor health                                                 | 21                                   | 18              | 144                       | 11                  | 5                         | 3                                 | 12                   | 10               | 2                        | 17                | 14                 | 257            |
| None of the above – I just wanted to retire                 | 13                                   | 12              | 94                        | 11                  | 3                         | 2                                 | 7                    | 7                | 2                        | 8                 | 8                  | 167            |

Appendix 2: Factors that would encourage doctors to stay working in medicine for longer, by speciality: numbers who selected each factor

| Factor encouraging doctors to stay                            | Hospital medical specialities (N=174) |    | Surgery (N=143) | General practice (N=384) | Paediatrics (N=40) | Emergency medicine (N=9) | Obstetrics and gynaecology (N=31) | Anaesthetics (N=53) | Radiology (N=36) | Clinical oncology (N=19) | Pathology (N=37) | Psychiatry (N=40) | Total (N=966) |
|---------------------------------------------------------------|---------------------------------------|----|-----------------|--------------------------|--------------------|--------------------------|-----------------------------------|---------------------|------------------|--------------------------|------------------|-------------------|---------------|
|                                                               | n                                     | n  |                 |                          |                    |                          |                                   |                     |                  |                          |                  |                   |               |
| Reduced impact of work-related bureaucracy                    | 77                                    | 66 | 199             | 21                       | 4                  | 13                       | 22                                | 21                  | 6                | 13                       | 15               | 457               |               |
| Workload reduction/shorter hours                              | 77                                    | 61 | 161             | 25                       | 5                  | 13                       | 23                                | 19                  | 9                | 15                       | 12               | 420               |               |
| Financial incentivisation                                     | 48                                    | 47 | 94              | 12                       | 2                  | 8                        | 17                                | 19                  | 7                | 9                        | 9                | 272               |               |
| Reduction of on-call or emergency commitments                 | 44                                    | 47 | 58              | 18                       | 5                  | 12                       | 22                                | 13                  | 5                | 6                        | 9                | 239               |               |
| None of these                                                 | 34                                    | 27 | 98              | 5                        | 2                  | 8                        | 14                                | 5                   | 4                | 12                       | 15               | 224               |               |
| Improved working conditions, other than (or as well as) hours | 34                                    | 26 | 70              | 9                        | 2                  | 10                       | 9                                 | 13                  | 5                | 10                       | 7                | 195               |               |
| Career change and development opportunities                   | 18                                    | 18 | 37              | 7                        | 2                  | 5                        | 4                                 | 5                   | 5                | 6                        | 1                | 108               |               |
| Other                                                         | 18                                    | 16 | 36              | 3                        | 0                  | 1                        | 4                                 | 1                   | 4                | 3                        | 3                | 89                |               |
| More involvement in direct patient care                       | 6                                     | 5  | 48              | 3                        | 2                  | 2                        | 2                                 | 2                   | 1                | 1                        | 2                | 74                |               |
| Less involvement in direct patient care                       | 15                                    | 8  | 11              | 4                        | 2                  | 3                        | 2                                 | 0                   | 4                | 3                        | 2                | 54                |               |

**Factors influencing the decisions of senior UK doctors to retire or remain in medicine:  
national surveys of the UK-trained medical graduates of 1974 and 1977**

Fay Smith, Shelly Lachish, Michael J Goldacre, Trevor W Lambert

STROBE Statement

|                              | <b>Item No</b> | <b>Recommendation</b>                                                                                                                                                                             |          |
|------------------------------|----------------|---------------------------------------------------------------------------------------------------------------------------------------------------------------------------------------------------|----------|
| <b>Title and abstract</b>    | 1              | (a) Indicate the study's design with a commonly used term in the title or the abstract                                                                                                            | Page 1   |
|                              |                | (b) Provide in the abstract an informative and balanced summary of what was done and what was found                                                                                               | Page 3   |
| <b>Introduction</b>          |                |                                                                                                                                                                                                   |          |
| Background/rationale         | 2              | Explain the scientific background and rationale for the investigation being reported                                                                                                              | Page 5   |
| Objectives                   | 3              | State specific objectives, including any prespecified hypotheses                                                                                                                                  | Page 5   |
| <b>Methods</b>               |                |                                                                                                                                                                                                   |          |
| Study design                 | 4              | Present key elements of study design early in the paper                                                                                                                                           | Page 6   |
| Setting                      | 5              | Describe the setting, locations, and relevant dates, including periods of recruitment, exposure, follow-up, and data collection                                                                   | Page 6   |
| Participants                 | 6              | (a) Give the eligibility criteria, and the sources and methods of selection of participants. Describe methods of follow-up                                                                        | Page 6   |
|                              |                | (b) For matched studies, give matching criteria and number of exposed and unexposed                                                                                                               | N/A      |
| Variables                    | 7              | Clearly define all outcomes, exposures, predictors, potential confounders, and effect modifiers. Give diagnostic criteria, if applicable                                                          | Page 6   |
| Data sources/<br>measurement | 8*             | For each variable of interest, give sources of data and details of methods of assessment (measurement). Describe comparability of assessment methods if there is more than one group              | Page 6,7 |
| Bias                         | 9              | Describe any efforts to address potential sources of bias                                                                                                                                         | Page 6,7 |
| Study size                   | 10             | Explain how the study size was arrived at                                                                                                                                                         | Page 6   |
| Quantitative<br>variables    | 11             | Explain how quantitative variables were handled in the analyses. If applicable, describe which groupings were chosen and why                                                                      | Page 6,7 |
| Statistical methods          | 12             | (a) Describe all statistical methods, including those used to control for confounding                                                                                                             | Page 6,7 |
|                              |                | (b) Describe any methods used to examine subgroups and interactions                                                                                                                               | Page 6,7 |
|                              |                | (c) Explain how missing data were addressed                                                                                                                                                       | Page 6,7 |
|                              |                | (d) If applicable, explain how loss to follow-up was addressed                                                                                                                                    | N/A      |
|                              |                | (e) Describe any sensitivity analyses                                                                                                                                                             | N/A      |
| <b>Results</b>               |                |                                                                                                                                                                                                   |          |
| Participants                 | 13*            | (a) Report numbers of individuals at each stage of study—eg numbers potentially eligible, examined for eligibility, confirmed eligible, included in the study, completing follow-up, and analysed | Page 8   |
|                              |                | (b) Give reasons for non-participation at each stage                                                                                                                                              | Page 8   |
|                              |                | (c) Consider use of a flow diagram                                                                                                                                                                | N/A      |
| Descriptive data             | 14*            | (a) Give characteristics of study participants (eg demographic, clinical, social) and information on exposures and potential confounders                                                          | Page 8   |
|                              |                | (b) Indicate number of participants with missing data for each variable of interest                                                                                                               | Page 8   |



|                          |     |                                                                                                                                                                                                              |            |
|--------------------------|-----|--------------------------------------------------------------------------------------------------------------------------------------------------------------------------------------------------------------|------------|
|                          |     | (c) Summarise follow-up time (eg, average and total amount)                                                                                                                                                  | Page 8     |
| Outcome data             | 15* | Report numbers of outcome events or summary measures over time                                                                                                                                               | Page 8,9   |
| Main results             | 16  | (a) Give unadjusted estimates and, if applicable, confounder-adjusted estimates and their precision (eg, 95% confidence interval). Make clear which confounders were adjusted for and why they were included | Page 9-10  |
|                          |     | (b) Report category boundaries when continuous variables were categorized                                                                                                                                    | N/A        |
|                          |     | (c) If relevant, consider translating estimates of relative risk into absolute risk for a meaningful time period                                                                                             | N/A        |
| Other analyses           | 17  | Report other analyses done—eg analyses of subgroups and interactions, and sensitivity analyses                                                                                                               | Page 9-10  |
| <b>Discussion</b>        |     |                                                                                                                                                                                                              |            |
| Key results              | 18  | Summarise key results with reference to study objectives                                                                                                                                                     | Page 11    |
| Limitations              | 19  | Discuss limitations of the study, taking into account sources of potential bias or imprecision. Discuss both direction and magnitude of any potential bias                                                   | Page 11-12 |
| Interpretation           | 20  | Give a cautious overall interpretation of results considering objectives, limitations, multiplicity of analyses, results from similar studies, and other relevant evidence                                   | Page 13    |
| Generalisability         | 21  | Discuss the generalisability (external validity) of the study results                                                                                                                                        | Page 13    |
| <b>Other information</b> |     |                                                                                                                                                                                                              |            |
| Funding                  | 22  | Give the source of funding and the role of the funders for the present study and, if applicable, for the original study on which the present article is based                                                | Page 4     |

\*Give information separately for exposed and unexposed groups.

**Note:** An Explanation and Elaboration article discusses each checklist item and gives methodological background and published examples of transparent reporting. The STROBE checklist is best used in conjunction with this article (freely available on the Web sites of PLoS Medicine at <http://www.plosmedicine.org/>, Annals of Internal Medicine at <http://www.annals.org/>, and Epidemiology at <http://www.epidem.com/>). Information on the STROBE Initiative is available at <http://www.strobe-statement.org>.
