# Supplementary material for: Factors influencing the decisions of senior UK doctors to retire or remain in medicine: national surveys of the UK-trained medical graduates of 1974 and 1977
Source: PubMed Central journal article supplement — BMJ Open. 2017 Oct 31;7(9):e017650. doi: 10.1136/bmjopen-2017-017650 (PMC5695300; doi:10.1136/bmjopen-2017-017650), 2017-10-31
Supplement: bmjopen-2017-017650supp001.pdf [file bmjopen-2017-017650supp001.pdf]

Appendix 1: Factors contributing to retirement decisions by specialty: numbers who selected each factor

| Factor contributing to retirement decisions                 |                                      |                 |                           |                     |                           |                                   |                      |                  |                          |                   |                    |                |
|-------------------------------------------------------------|--------------------------------------|-----------------|---------------------------|---------------------|---------------------------|-----------------------------------|----------------------|------------------|--------------------------|-------------------|--------------------|----------------|
|                                                             | Hospital medical specialties (N=237) | Surgery (N=206) | General practice (N=1249) | Paediatrics (N=114) | Emergency medicine (N=19) | Obstetrics and gynaecology (N=45) | Anaesthetics (N=157) | Radiology (N=72) | Clinical oncology (N=25) | Pathology (N=119) | Psychiatry (N=147) | Total (N=2390) |
|                                                             | n                                    | n               | n                         | n                   | n                         | n                                 | n                    | n                | n                        | n                 | n                  | n              |
| To increase time for leisure/other interests                | 131                                  | 93              | 656                       | 54                  | 5                         | 19                                | 83                   | 42               | 9                        | 63                | 67                 | 1222           |
| Pressure of work                                            | 77                                   | 59              | 645                       | 47                  | 10                        | 15                                | 51                   | 34               | 10                       | 50                | 55                 | 1053           |
| Reduced job satisfaction                                    | 82                                   | 91              | 557                       | 46                  | 7                         | 16                                | 61                   | 22               | 7                        | 42                | 67                 | 998            |
| To maintain good health                                     | 70                                   | 61              | 434                       | 28                  | 5                         | 17                                | 58                   | 21               | 9                        | 27                | 46                 | 776            |
| Financial security/insufficient financial incentive to stay | 64                                   | 64              | 375                       | 25                  | 4                         | 13                                | 54                   | 22               | 8                        | 29                | 52                 | 710            |
| The prospect of revalidation                                | 52                                   | 39              | 333                       | 26                  | 4                         | 6                                 | 38                   | 14               | 2                        | 24                | 23                 | 561            |
| Possibility of deteriorating skill/competence               | 23                                   | 33              | 253                       | 18                  | 6                         | 12                                | 49                   | 12               | 3                        | 11                | 15                 | 435            |
| Other                                                       | 51                                   | 41              | 164                       | 24                  | 3                         | 7                                 | 27                   | 12               | 11                       | 24                | 35                 | 399            |
| Not wanting to do out-of-hours work                         | 31                                   | 61              | 122                       | 19                  | 4                         | 19                                | 46                   | 37               | 3                        | 19                | 21                 | 382            |
| Retirement of spouse/ partner                               | 44                                   | 17              | 207                       | 22                  | 0                         | 2                                 | 22                   | 11               | 2                        | 20                | 19                 | 366            |
| Family reasons                                              | 44                                   | 29              | 188                       | 22                  | 1                         | 3                                 | 14                   | 8                | 8                        | 11                | 17                 | 345            |
| Poor health                                                 | 21                                   | 18              | 144                       | 11                  | 5                         | 3                                 | 12                   | 10               | 2                        | 17                | 14                 | 257            |
| None of the above – I just wanted to retire                 | 13                                   | 12              | 94                        | 11                  | 3                         | 2                                 | 7                    | 7                | 2                        | 8                 | 8                  | 167            |
