# Supplementary material for: Factors influencing the decisions of senior UK doctors to retire or remain in medicine: national surveys of the UK-trained medical graduates of 1974 and 1977
Source: PubMed Central journal article supplement — BMJ Open. 2017 Oct 31;7(9):e017650. doi: 10.1136/bmjopen-2017-017650 (PMC5695300; doi:10.1136/bmjopen-2017-017650), 2017-10-31
Supplement: bmjopen-2017-017650supp002.pdf [file bmjopen-2017-017650supp002.pdf]

Appendix 2: Factors that would encourage doctors to stay working in medicine for longer, by speciality: numbers who selected each factor

| Factor encouraging doctors to stay                            | Speciality                            |                 |                          |                    |                          |                                   |                     |                  |                          |                  |                   |               |
|---------------------------------------------------------------|---------------------------------------|-----------------|--------------------------|--------------------|--------------------------|-----------------------------------|---------------------|------------------|--------------------------|------------------|-------------------|---------------|
|                                                               | Hospital medical specialities (N=174) | Surgery (N=143) | General practice (N=384) | Paediatrics (N=40) | Emergency medicine (N=9) | Obstetrics and gynaecology (N=31) | Anaesthetics (N=53) | Radiology (N=36) | Clinical oncology (N=19) | Pathology (N=37) | Psychiatry (N=40) | Total (N=966) |
|                                                               | n                                     | n               | n                        | n                  | n                        | n                                 | n                   | n                | n                        | n                | n                 | n             |
| Reduced impact of work-related bureaucracy                    | 77                                    | 66              | 199                      | 21                 | 4                        | 13                                | 22                  | 21               | 6                        | 13               | 15                | 457           |
| Workload reduction/shorter hours                              | 77                                    | 61              | 161                      | 25                 | 5                        | 13                                | 23                  | 19               | 9                        | 15               | 12                | 420           |
| Financial incentivisation                                     | 48                                    | 47              | 94                       | 12                 | 2                        | 8                                 | 17                  | 19               | 7                        | 9                | 9                 | 272           |
| Reduction of on-call or emergency commitments                 | 44                                    | 47              | 58                       | 18                 | 5                        | 12                                | 22                  | 13               | 5                        | 6                | 9                 | 239           |
| None of these                                                 | 34                                    | 27              | 98                       | 5                  | 2                        | 8                                 | 14                  | 5                | 4                        | 12               | 15                | 224           |
| Improved working conditions, other than (or as well as) hours | 34                                    | 26              | 70                       | 9                  | 2                        | 10                                | 9                   | 13               | 5                        | 10               | 7                 | 195           |
| Career change and development opportunities                   | 18                                    | 18              | 37                       | 7                  | 2                        | 5                                 | 4                   | 5                | 5                        | 6                | 1                 | 108           |
| Other                                                         | 18                                    | 16              | 36                       | 3                  | 0                        | 1                                 | 4                   | 1                | 4                        | 3                | 3                 | 89            |
| More involvement in direct patient care                       | 6                                     | 5               | 48                       | 3                  | 2                        | 2                                 | 2                   | 2                | 1                        | 1                | 2                 | 74            |
| Less involvement in direct patient care                       | 15                                    | 8               | 11                       | 4                  | 2                        | 3                                 | 2                   | 0                | 4                        | 3                | 2                 | 54            |
